1 **A base-line cellular antiviral state is maintained by cGAS and its most frequent naturally**  
2 **occurring variant rs610913**

3

4 Julia Kazmierski<sup>1,2,3</sup>, Carina Elsner<sup>4,3</sup>, Katinka Döhner<sup>5</sup>, Shuting Xu<sup>3</sup>, Aurélie Ducroux<sup>3</sup>, Fabian  
5 Pott<sup>1,2,3</sup>, Jenny Jansen<sup>1,2</sup>, Christian W. Thorball<sup>6,7,8</sup>, Ole Zeymer<sup>9</sup>, Xiaoyi Zhou<sup>9,15</sup>, Roman  
6 Fedorov<sup>9,15</sup>, Jacques Fellay<sup>6,7,8</sup>, Markus W. Löffler<sup>10,11,12,13</sup>, Alexander N. R. Weber<sup>10,13,14</sup>,  
7 Beate Sodeik<sup>5,15,16</sup>, and Christine Goffinet<sup>1,2,3\*</sup>

8

9 <sup>1</sup>Institute of Virology, Campus Charité Mitte, Charité - Universitätsmedizin Berlin, Charitéplatz  
10 1, 10117 Berlin, Germany

11 <sup>2</sup>Berlin Institute of Health, Berlin (BIH), Anna-Louisa-Karsch-Str. 2, 10178 Berlin, Germany

12 <sup>3</sup>Institute of Experimental Virology, Twincore Centre for Experimental and Clinical Infection  
13 Research, a joint venture between the Hannover Medical School (MHH) and the Helmholtz  
14 Centre for Infection Research (HZI), 30625 Hannover, Germany

15 <sup>4</sup>Institute for Virology, University Hospital Essen, University of Duisburg-Essen, 45122 Essen,  
16 Germany

17 <sup>5</sup>Institute of Virology, Hannover Medical School, Carl-Neuberg-Str. 1, 30625 Hannover,  
18 Germany

19 <sup>6</sup>School of Life Sciences, École Polytechnique Fédérale de Lausanne, Lausanne, Switzerland

20 <sup>7</sup>Swiss Institute of Bioinformatics, Lausanne, Switzerland

21 <sup>8</sup>Precision Medicine Unit, Lausanne University Hospital and University of Lausanne,  
22 Lausanne, Switzerland

23 <sup>9</sup>Institute for Biophysical Chemistry, Research Division for Structural Biochemistry, Hannover  
24 Medical School, Hannover, Germany

25 <sup>10</sup>Interfaculty Institute for Cell Biology, Department of Immunology, University of Tübingen,  
26 Tübingen, Germany

27 <sup>11</sup>Department of General, Visceral and Transplant Surgery, University Hospital Tübingen,  
28 Tübingen Germany.

29 <sup>12</sup>Department of Clinical Pharmacology, University Hospital Tübingen, Tübingen, Germany.

30 <sup>13</sup>iFIT – Cluster of Excellence (EXC 2180) “Image-Guided and Functionally Instructed Tumor  
31 Therapies”, University of Tübingen, Tübingen, Germany.

32 <sup>14</sup>CMFI – Cluster of Excellence (EXC 2124) “Controlling microbes to fight infection”,  
33 University of Tübingen, Tübingen, Germany.

34 <sup>15</sup>RESIST – Cluster of Excellence, Hannover Medical School, Hannover, Germany.

35 <sup>16</sup>German Center for Infection Research (DZIF), Hannover-Braunschweig Partner site,  
36 Germany.

37

38 \*Corresponding author: Christine Goffinet, Institute of Virology, Campus Charité Mitte,  
39 Charité - Universitätsmedizin Berlin, Charitéplatz 1, 10117 Berlin, Germany

40 Phone: +0049 30 450 525 489

41 e-mail: [christine.goffinet@charite.de](mailto:christine.goffinet@charite.de)

42

43

44

45

46

47 **Nonstandard Abbreviations**

- 48 BCG – Bacille Calmette-Guérin; Vaccine against Tuberculosis
- 49 cGAMP – cyclic Guanosine Monophosphate-Adenosine Monophosphate
- 50 cGAS – Cyclic GMP-AMP Synthase
- 51 CHIKV – Chikungunya Virus
- 52 DEG – Differentially Expressed Gene
- 53 EFV – Efavirenz
- 54 IFIT1 – Interferon-Induced Protein with Tetratricopeptide Repeats 1
- 55 IFN – Interferon
- 56 ISG - Interferon-Stimulated Gene
- 57 IRF3/7 - Interferon Regulatory Factor 3/7
- 58 KSHV – Kaposi’s Sarcoma-Associated Herpesvirus
- 59 MX2 – MX Dynamin Like GTPase 2
- 60 PBMC – Peripheral Blood Mononuclear Cell
- 61 PHA – Phytohaemagglutinin
- 62 PRR – Pattern Recognition Receptor
- 63 RLU – Relative Light Unit
- 64 RPKM – Reads per Kilobase of Transcript
- 65 RT – Reverse Transcriptase
- 66 SNP – Single-Nucleotide Polymorphism
- 67 STAT1 – Signal Transducer and Activator of Transcription 1
- 68 STING – Stimulator of Interferon Genes
- 69 TBK1 – TANK-binding Kinase 1
- 70 TREX-1 – Three Prime Repair Exonuclease 1
- 71 VSV-G – Vesicular Stomatitis Virus Glycoprotein

72 **Abstract (250 words limit)**

73 Upon recognition of aberrantly located DNA, the innate immune sensor cGAS activates  
74 STING/IRF-3-driven antiviral responses. Here we characterized the ability of a specific variant  
75 of the cGAS-encoding gene *MB21D1*, rs610913, to alter cGAS-mediated DNA sensing and  
76 viral infection. rs610913 is a frequent G>T polymorphism resulting in a P<sup>261</sup>H exchange in the  
77 cGAS protein. Data from the International Collaboration for the Genomics of HIV suggested  
78 that rs610913 nominally associates with HIV-1 acquisition *in vivo*. Molecular modeling of  
79 cGAS(P<sup>261</sup>H) hinted towards the possibility for an additional binding site for a potential cellular  
80 co-factor in cGAS dimers. However, cGAS(WT) or cGAS(P<sup>261</sup>H)-reconstituted THP-1 cGAS  
81 KO cells shared steady-state expression of interferon-stimulated genes (ISGs), as opposed to  
82 cells expressing the enzymatically inactive cGAS(G<sup>212</sup>A/S<sup>213</sup>A). Accordingly, cGAS(WT) and  
83 cGAS(P<sup>261</sup>H) cells were less susceptible to lentiviral transduction and infection with HIV-1,  
84 HSV-1, and Chikungunya virus as compared to cGAS KO- or cGAS(G<sup>212</sup>A/S<sup>213</sup>A) cells. Upon  
85 DNA challenge, innate immune activation appeared to be mildly reduced upon expression of  
86 cGAS(P<sup>261</sup>H) compared to cGAS(WT). Finally, DNA challenge of PBMCs from donors  
87 homozygously expressing rs610913 provoked a trend towards a slightly reduced type I IFN  
88 response as compared to PBMCs from GG donors. Taken together, the steady-state activity of  
89 cGAS maintains a base-line antiviral state rendering cells more refractory to ISG-sensitive viral  
90 infections. Even though rs610913 failed to grossly differ phenotypically from the wild-type  
91 gene, its expression potentially results in a slightly altered susceptibility to viral infections *in*  
92 *vivo*.

93

94

95 **Key Words**

96 cGAS, antiviral immunity, interferon, DNA sensing

97

## 98 **Introduction**

99 Pattern Recognition Receptors (PRRs) of the innate immune system are crucial for the detection  
100 of invading pathogens and required to mount an effective immune response. The cyclic-GMP-  
101 AMP-synthase (cGAS) binds to double-stranded DNA in the cytosol and nucleus, followed by  
102 its enzymatic activation and the production of the second messenger molecule 2'3'-cyclic  
103 GMP-AMP (cGAMP) (1, 2). This small molecule, in turn, binds to the Stimulator of IFN Genes  
104 (STING), leading to its activation, phosphorylation and eventually induction of a TANK  
105 binding kinase (TBK1)/Interferon regulatory factor 3 (IRF3)-dependent signaling cascade,  
106 resulting in the transcription of interferons (IFNs) and IFN-stimulated genes (ISGs), many of  
107 them exerting antiviral activity.

108 cGAS-mediated recognition of invading pathogens serves as a first-line defense  
109 mechanism against multiple viruses, which themselves evolved strategies to counteract cGAS-  
110 mediated sensing. The genome of invading DNA viruses, such as HSV-1 or KSHV, is  
111 recognized in a cGAS-dependent fashion (reviewed in Ref. 3, 4,5). As a consequence, herpes  
112 viruses evolved specific antagonists that counteract cGAS/STING-mediated DNA sensing,  
113 including HSV-1 pUL41 which selectively targets cGAS mRNA for degradation (6), HSV-1  
114 ICP27 which prevents cGAS phosphorylation (7), or HSV-1-pUL36 which targets STING to  
115 proteasomal degradation (8) and therefore interferes with the activation of the crucial  
116 transcription factor IRF3. Retroviruses, including HIV-1, evolved a sophisticated replication  
117 strategy. Specifically, reverse transcription of their RNA genome into a single DNA  
118 intermediate that is destined for integration into a host cell's chromosome allows retroviruses  
119 to largely escape general innate immune activation (9) and cGAS-dependent recognition (10).  
120 These observations are in line with studies reporting that innate sensing of HIV-1 infection only  
121 occurs upon pharmacological or genetic destabilization of the otherwise nucleic acid-shielding

122 viral capsid (11, 12), and is enhanced in the absence of functional TREX1 expression, that  
123 otherwise degrades capsid-escaping and thus cytosolic HIV-1 DNA (13, 14). Interestingly, also  
124 RNA viruses have been considered to be inhibited by cGAS-exerted functions, although not  
125 mediated through sensing of viral nucleic acids. Rather, cGAS may maintain a basal antiviral  
126 state through recognition of self DNA, including endogenous retroelements (15) and/or sensing  
127 of DNA released from the nucleus or mitochondria through infection-associated stress  
128 induction (16, 17).

129         Single nucleotide polymorphisms (SNPs) in genes encoding PRRs and downstream  
130 adapter molecules modulate infection susceptibility and disease outcome. A remarkable  
131 example is the variant of the STING-encoding *TMEM173* gene that contains three non-  
132 synonymous SNPs referred to as ‘the HAQ haplotype’. Homozygous expression of this  
133 haplotype is predominantly found in East Asian (16.07%) and South American (7.78%)  
134 populations (18). It is associated with lower susceptibility to stimulation by cyclic dinucleotides  
135 (19) and eventually a severely reduced ability to induce IFN- $\beta$  expression (19, 20).  
136 Interestingly, among other homozygous SNPs in the *TMEM173* gene, the HAQ haplotype has  
137 a higher prevalence in HIV-1 long-term non-progressors, as compared to HIV-1 non-controllers  
138 (21).

139         To date, there is limited knowledge on the role of SNPs in the cGAS-encoding gene  
140 *MB21D1*, in particular on implications for DNA sensing and innate immune activation. The  
141 most frequent SNP in *MB21D1* is rs610913, a G>T polymorphism that displays a global allele  
142 frequency of T = 0.503 (22). The G to T nucleotide exchange results in a single amino acid  
143 exchange from histidine (H) to proline (P) at position 261 in the protein sequence. Here, we  
144 report structural and functional consequences of the rs610913-encoded P<sup>261</sup>H single amino acid  
145 exchange in the cGAS protein in the context of DNA sensing and restriction of viral infections.

## 146 **Materials and Methods**

147

## 148 **Genome-wide association analysis**

149 Summary statistics for HIV-1 acquisition in the region of *MB21D1* were obtained from  
150 genome-wide association analyses (GWAS) previously performed by the International  
151 Collaboration for the Genomics of HIV (ICGH) (23). The summary statistics were available on  
152 a sub-group basis, with a total of 6 groups matched by geographic origin and genotyping  
153 platform, as previously described; Group 1 (The Netherlands, Illumina), Group 2 (France,  
154 Illumina), Group 3 (North America, Illumina), Group 4 (French European, Illumina), Group 5  
155 (North American, Affymetrix), and Group 6 (non-Dutch/non-French European, Affymetrix).  
156 Association results across groups were combined using a fixed-effects inverse-variance  
157 weighted meta-analysis.

158

## 159 **Molecular modeling**

160 The structural model of hcGAS(P<sup>261</sup>H)•dsDNA assembly in the active (ATP-bound)  
161 conformational state was created using the ladder-like crystal structure of mouse cGAS in  
162 complex with dsDNA (PDB-code: 5N6I) (24) and the structure of the wild type  
163 hcGAS•dsDNA•ATP complex (PDB-code: 6CTA) (25). The protein part of the  
164 hcGAS•dsDNA•ATP complex was used to generate a homology model of hcGAS(P<sup>261</sup>H) in the  
165 active conformational state. The homology model of hcGAS(P<sup>261</sup>H) was superimposed on the  
166 mcGAS molecules in the ladder-like assembly. The superposition was performed using the  
167 program package Coot (26). The secondary structure matching algorithm (SSM) (27) was used  
168 to align the structurally conserved parts of the proteins. The resulting model was subjected to  
169 an energy minimization procedure using the program HyperChem (Hypercube, Inc.) with  
170 AMBER force field (28) and a distance-dependent dielectric constant. The structural analysis  
171 and rendering of Figure 1B and C were performed with the final energy minimized model using

172 the programs COOT and PyMOL (The PyMOL Molecular Graphics System, Version 1.8  
173 Schrödinger, LLC).

174

### 175 **Healthy study subjects and blood sample acquisition**

176 Healthy blood donors were recruited at the Interfaculty Institute of Cell Biology, Department  
177 of Immunology, University of Tübingen. All healthy blood donors included in this study  
178 provided their written informed consent before study participation. Approval for use of their  
179 biomaterials was obtained by the respective local ethics committees (approvals 156-2012BO1  
180 and 354-2012BO2), in accordance with the principles laid down in the Declaration of Helsinki  
181 as well as applicable laws and regulations.

182

### 183 **Cell lines and primary cells**

184 cGAS KO THP-1 cells (a kind gift from Veit Hornung, Ludwig-Maximilians University,  
185 Munich) were cultured in RPMI 1640 medium supplemented with 10% fetal calf serum (FCS),  
186 100 U/ml penicillin, 100 µg/ml streptomycin, 2 mM L-glutamine, 1x MEM non-essential amino  
187 acids solution and 1 mM sodium pyruvate (Thermo Fisher Scientific, Waltham, Massachusetts,  
188 USA). HEK293T, HEK293T STING-mcherry (1) and BHK-21 cells were maintained in  
189 DMEM cell culture medium supplemented with 10% fetal calf serum (FCS), 100 U/ml  
190 penicillin, 100 µg/ml streptomycin and 2 mM L-glutamine. HL116 cells (29) were cultured  
191 under identical conditions, except for the addition of 1x hypoxanthine-aminopterin-thymidine  
192 (HAT) media supplement (Thermo Fisher Scientific, Waltham, Massachusetts, USA). THP-1  
193 cGAS KO cells and HEK293T STING-mcherry cells were reconstituted with individual cGAS-  
194 GFP variants by lentiviral transduction and were maintained under 1 µg/ml puromycin  
195 selection. After preparation of PBMCs from EDTA-anticoagulated blood by Ficoll-Hypaque  
196 centrifugation, cells were stimulated with IL-2 (10 ng/ml) and phytohaemagglutinin (PHA) (1



197  $\mu\text{g/ml}$ ) for 3-4 days, resulting in cultures containing  $>90\%$   $\text{CD3}^+$  T-cells. Cells were maintained  
198 in RPMI 1640 containing 10% heat-inactivated fetal calf serum, 100 U/ml penicillin, 100  $\mu\text{g/ml}$   
199 streptomycin, 2 mM L-glutamine, 1x MEM non-essential amino acids solution, and 1 mM  
200 sodium pyruvate (Thermo Fisher Scientific, Waltham, Massachusetts, USA).

201

## 202 **Generation of lentiviral vector particles and virus stocks**

203 VSV-G-pseudotyped lentiviral vector particles encoding GFP or luciferase were generated by  
204 calcium phosphate-based transfection of HEK293T cells with the packaging plasmid pCMV  
205  $\Delta\text{R8.91}$  (30), the lentiviral transfer plasmids pHR-GFP (31) or pCSII-EF-luciferase (32) and  
206 pCMV-VSV-G (33). For the generation of cGAS-transducing lentiviral particles, the transfer  
207 plasmids pWPI cGAS(WT)-GFP, pWPI cGAS( $\text{G}^{212}\text{A}/\text{S}^{213}\text{A}$ )-GFP (34), and pWPI cGAS  
208 ( $\text{P}^{261}\text{H}$ )-GFP were used. pWPI cGAS( $\text{P}^{261}\text{H}$ )-GFP was generated by site-directed mutagenesis  
209 (Stratagene California, La Jolla, California, USA), and the correct introduction of the mutation  
210 was confirmed by Sanger sequencing. Vector-containing supernatant was collected 40 and 64  
211 hours post-transfection and subjected to ultracentrifugation through a 20% sucrose cushion. To  
212 remove residual plasmid DNA, concentrated virus stocks were DNase I-digested twice and  
213 stored in aliquots at  $-80^\circ\text{C}$ . VSV-G-pseudotyped HIV-1 NL4.3 luciferase reporter virus was  
214 produced by calcium phosphate-based transfection of HEK293T cells with a HIV-1 NL4.3  
215  $\Delta\text{Env } \Delta\text{Vpr}$  luciferase reporter plasmid (35) and a VSV-G-encoding plasmid. Virus-containing  
216 supernatants were harvested 60 hours post-transfection and concentrated by ultracentrifugation.

217 HSV-1  $\Delta\text{UL41N}$  (HSV-1(KOS) UL41NHB) encoding a truncated version of pUL41  
218 was kindly provided by David A. Leib (36). To prepare concentrated stocks, extracellular  
219 virions were pelleted from the medium of cells infected at a multiplicity of infection (MOI) of  
220 0.01 PFU/cell for 3 days (37–39). Virus stocks were plaque-titrated on Vero cells (38, 40). To

221 determine the genome/PFU ratio of HSV-1 stocks, we quantified the number of HSV-1  
222 genomes by quantitative PCR as described previously (37, 41).

223 The CHIKV 181/25 infectious stock (42) expressing a nano-Luciferase fused to the E2  
224 glycoprotein (a kind gift from G. Simmons, Vitalant Research Institute) was produced by *in*  
225 *vitro*-transcription of the full-length, linearized molecular DNA clone into RNA and subsequent  
226 RNA electroporation into BHK-21 cells. Virus-containing supernatant was collected three days  
227 post electroporation, filtered through membranes of 0.45  $\mu\text{m}$  pores and stored in aliquots at -  
228 80°C.

229

### 230 **Flow cytometry**

231 For quantification of cGAS-GFP expression in transduced THP-1 or HEK293T cells, cells were  
232 PFA-fixed and GFP positivity was quantified by flow cytometry. HSV-1-challenged HEK293T  
233 cells were PBS-washed, PFA-fixed and immunostained for intracellular HSV-1 VP5 using  
234 rabbit anti-HSV-1 VP5 (#SY4563) and an appropriate fluorochrome-conjugated secondary  
235 antibody in 0.1% Triton in PBS (10, 43). Samples were analyzed on a FACS Lyric device  
236 (Becton Dickinson, Franklin Lakes, New Jersey, USA) with BD Suite Software for analysis.

237

### 238 **Immunoblotting**

239 Cell lysates were generated with M-PER Mammalian Protein Extraction Reagent (Thermo  
240 Fisher Scientific, Waltham, Massachusetts, USA), run on a 10% SDS-PAGE and transferred  
241 onto nitrocellulose using a semi-dry transfer system (Bio-Rad Laboratories, Hercules,  
242 California, USA). BSA-blocked membranes were incubated with the primary antibodies  
243 mouse-anti human actin (#8226, Abcam, Cambridge, UK), rabbit-anti human cGAS (#15102,  
244 Cell Signaling, Danvers Massachusetts, USA), rabbit-anti human IRF3 (#4302, Cell Signaling),  
245 rabbit-anti human pIRF3 (#29047, Cell Signaling), rabbit-anti human pSTING (#19781 Cell

246 Signaling), rabbit-anti human pTBK1 (#5483, Cell Signaling), rabbit-anti human STING  
247 (#13647S, Cell Signaling), rabbit-anti human TBK1 (#3504, Cell Signaling) or rabbit-anti  
248 human TREX1 (#185228, Abcam). Secondary antibodies conjugated to Alexa680/800  
249 fluorescent dyes were used for detection and quantification by Odyssey Infrared Imaging  
250 System (LI-COR Biosciences Lincoln, NE, USA).

251

## 252 **Quantitative RT-PCR**

253 Total RNA from cells was extracted using the RNeasy Mini Kit (Qiagen, Hilden, Germany),  
254 and residual DNA contaminations were removed with the RNase-free DNase set (Qiagen,  
255 Hilden, Germany). Following cDNA synthesis (New England Biolabs, Ipswich, Massachusetts,  
256 USA), quantification of relative mRNA levels was performed using Taq-Man PCR technology  
257 (Thermo Fisher Scientific, Waltham, Massachusetts, USA) with primer-probe kits (Applied  
258 Biosystems, Waltham, Massachusetts, USA) for following genes:

259 *ACTB* (Hs03023943\_g1), *ARL16* (Hs01586770\_g1), *BST2* (Hs00171632\_m1), *cGAS*  
260 (Hs00403553\_m1), *HAUS7* (Hs00213860\_m1), *IFIT1* (Hs01911452\_s1), *IFN- $\beta$*   
261 (Hs01077958\_s1), *IRF3* (Hs01547283\_m1), *LYAR* (Hs00215132\_m1), *MX2*  
262 (Hs01550814\_m1), *RPL30* (Hs00265497\_m1), *RPS11* (Hs06642555\_g1), *STING*  
263 (Hs00736958\_m1), *TCP1* (Hs01053946\_g1), *TREX1* (Hs03989617\_s1), *TRMT10C*  
264 (Hs01933516\_s1), *YBX1* (Hs00358903\_g1).

265 Relative mRNA levels were determined in multiplex reactions using the  $\Delta\Delta C_t$  method with  
266 human *RNASEP* mRNA as an internal reference. Each sample was analyzed in technical  
267 triplicates and with parallel controls omitting reverse transcriptase. Assays were performed on  
268 an OneStep Plus machine (Applied Biosystems, Waltham, Massachusetts, USA) or a  
269 LightCycler 480 II (Roche, Basel, Switzerland). Data analysis was performed using Applied  
270 Biosystems Step One Software (Version 2.3) or LightCycler 480 Software (Version 1.5).

271

## 272 **RNA sequencing**

273 Total RNA extraction from cells and DNase treatment were performed with the RNeasy Mini  
274 kit and RNase-free DNase set (Qiagen, Hilden, Germany). The quality and integrity of total  
275 RNA were verified on an Agilent Technologies 2100 Bioanalyzer (Agilent Technologies,  
276 Waldbronn, Germany). The RNA sequencing libraries were generated using TruSeq Stranded  
277 mRNA Library Prep Kits (Illumina, San Diego, California, USA) following the manufacturer's  
278 protocol. The libraries were sequenced on Illumina HiSeq4000 (paired-end run 2 x 75 bp) with  
279 an average of  $9 \times 10^7$  reads per RNA sample. Data generated from individual samples were  
280 mapped separately against the hg38 human reference genome. Gene expression was calculated  
281 for individual transcripts as reads per kilobase per million bases mapped (RPKM). All  
282 transcriptomic analyses were performed using Geneious Prime Version 2020.0.4 (Biomatters,  
283 New Zealand). Differentially expressed genes (DEGs) were identified by calculating fold  
284 changes in expression, genes were considered to be expressed significantly differently if their  
285 expression was increased by at least a factor of two with a p-value of  $< 0.05$ . Gene ontology  
286 enrichment analyses were performed using the Panther overrepresentation test  
287 (<http://geneontology.org/>), Homo sapiens reference list, and GO biological process complete  
288 annotation data set. p-values were corrected using a false discovery rates (Ashburner et al.,  
289 2000; The Gene Ontology Consortium, 2019).

290

## 291 **Electroporation**

292 10 million THP-1 cells and PBMCs were electroporated (140 V, 1000  $\mu$ F) in serum-free RPMI  
293 in the presence of endotoxin-free plasmid DNA (12  $\mu$ g DNA, or indicated quantities), 4  $\mu$ g  
294 cGAMP (Invivogen, San Diego, Californien, USA), 4  $\mu$ g c-di-UMP (Invivogen, San Diego,

295 Californien, USA) or mock-electroporated using a Gene Pulser Xcell Electroporation  
296 instrument (Bio-Rad Laboratories, Hercules, California, USA) and 0.2 cm cuvettes  
297

### 298 **HL116 cell-based detection of bioactive IFNs**

299 Culture supernatants of individual cell lines were titrated on HL116 cells that express the  
300 luciferase gene under the control of the IFN-inducible 6-16 promoter (29). Six hours post-  
301 inoculation, cells were PBS-washed and luciferase expression was determined using Cell  
302 Culture Lysis Buffer (Promega, Madison, Wisconsin, USA) and the Luciferase Assay System  
303 (Promega, Madison, Wisconsin, USA). The concentration of IFN was quantified using an IFN-  
304  $\alpha$ 2a (Roferon) standard curve.

305

### 306 **Protein Purification**

307 The full-length human cGAS(WT) and cGAS(P<sup>261</sup>H) proteins were expressed in *E.coli*  
308 BL21(DE3). The expression was induced by 0.5 M isopropyl- $\beta$ -D-thiogalactoside and  
309 incubated at 18°C for 18 h. After centrifugation at 5,000 x g for 15 min, pellets were  
310 resuspended in 20 ml PBS and centrifuged again at 5000 x g for 15 min. The cells were flash-  
311 frozen and stored at -80°C until purification. For purification, pellets were thawed and  
312 resuspended in a buffer containing 300 mM NaCl, 50 mM Na<sub>3</sub>PO<sub>4</sub>, 10 mM imidazole, pH 7.5  
313 with complete protease inhibitor cocktail (Roche, Basel, Switzerland) and lysed by sonification  
314 for 2 min, with 4 min breaks after eachminute of sonification to prevent overheating of the  
315 lysate. DNase I was added to remove a possible impurity caused by the cellular DNA bound to  
316 cGAS. After 30 minutes of incubation at room temperature, the sample was centrifuged at  
317 40,000 x g for 1 h. The supernatant was filtered using a 0.45  $\mu$ m syringe filter and loaded onto  
318 a 5 ml Protino Ni-NTA column (Macherey-Nagel, Düren, Germany). The column was washed  
319 until UV280 had reached a steady value and eluted with 500 mM imidazole, 150 mM NaCl, 50

320 mM Na<sub>3</sub>PO<sub>4</sub>, pH 7.5. The pooled fractions were diluted with low salt buffer (50 mM NaCl, 20  
321 mM Tris, pH 7.5) to prevent protein aggregation caused by a high salt concentration of the  
322 elution buffer. The diluted eluate was then loaded onto a 1 ml HiTrap Heparin HP column (GE  
323 Healthcare, Chalfont St Giles, UK). After loading, the column was washed until UV280 reached  
324 a steady value before elution with an increasing salt gradient buffer: 50 mM – 2 M NaCl, 20  
325 mM Tris, pH 7.5. The elution was concentrated by centrifugation with 30,000 MWCO Vivaspin  
326 Hydrosart (Sartorius, Göttingen, Germany) and, if needed, diluted with low salt buffer to the  
327 final protein concentration used for the *in vitro* activity assay. The purified protein was flash-  
328 frozen in liquid nitrogen and stored at –80°C.

329

### 330 ***In vitro* cGAS activity assay**

331 2 μM recombinant human cGAS was incubated for 2h at 37°C with the substrates 0.5 mM ATP  
332 and 0.5 mM GTP, in the presence of 1 ng/μl dsDNA fragments NoLimits (Thermo Fisher  
333 Scientific, Waltham, Massachusetts, USA) of 1, 4 or 6 kb length, in a buffer containing 120.25  
334 mM MnCl<sub>2</sub>, 20 mM NaCl, 2.5 mM MgCl<sub>2</sub>, 8 mM Tris-HCl, pH 7.5 in a total volume of 200 μl.  
335 Following incubation, samples were inactivated at 95°C for 20 min. Samples were centrifuged  
336 at 14500 x rpm for 15 min at 4°C, and the supernatant was diluted 1:100 with H<sub>2</sub>O for HPLC  
337 measurement with the API 4000 LC-MS/MC System (Sciex, Framingham, Massachusetts,  
338 USA) for 2'3'cGAMP quantification. The gradient started with 100% buffer A (3/97 (v/v)  
339 MeOH/H<sub>2</sub>O, 50 mM NH<sub>4</sub>Ac, 0.1% HAc) and reached 50% buffer A, 50% buffer B (97/3 (v/v)  
340 MeOH/H<sub>2</sub>O, 50 mM NH<sub>4</sub>Ac, 0.1% HAc) after 5 min. The sample was run over a ZORBAX  
341 Eclipse XDB-C18 1.8 μm, 50 × 4.6 mm (Agilent Technologies, Waldbronn, Germany) column.  
342 Measurements and data generation were controlled by Analyst software (version 1.5.2.,  
343 SCIEX). Calibration was conducted with 10 μl of synthetic derived 2'3'cGAMP mixed with  
344 800 μl extraction reagent (2/2/1 [v/v/v] methanol, acetonitrile and water mixture) and 300 μl

345 extraction reagent (25 ng/mL tenofovir in extraction reagent) with tenofovir as the internal  
346 standard.

347

### 348 **Infection and transduction assays**

349 30 min prior to lentiviral transduction, cells were left untreated or treated with Efavirenz (EFV;  
350 100 nM). Inhibitor treatment was maintained during the subsequent virus inoculation.  
351 Transduction and virus infection assays were performed by spin-inoculation for 60 min at 32°C.  
352 Following spinoculation, cells were incubated at 37°C, 5% CO<sub>2</sub>, and individual wells were  
353 harvested at indicated time points.

354

### 355 **Luciferase assay**

356 Luciferase expression of cells challenged with VSV-G lentiviral vectors or VSV-G/HIV-1  
357 NL4.3 was quantified 72 hours post-transduction. Cells were washed with PBS, lysed using  
358 Cell Culture Lysis Buffer (Promega, Madison, Wisconsin, USA) and luciferase activity was  
359 quantified using the Luciferase Assay System (Promega, Madison, Wisconsin, USA). To detect  
360 nanoluciferase expression in supernatants from CHIKV-infected cells, the Nano-Glo Luciferase  
361 Assay System (Promega, Madison, Wisconsin, USA) was used according to manufacturer's  
362 instruction.

363

### 364 **LPS and poly(I:C) treatment**

365 IL-2/PHA-activated PBMCs were treated with 40 ng/ml LPS or 20 µg/ml poly(I:C) as  
366 previously described (46, 47).

367

### 368 **Reagents and inhibitors**

369 Fragmented dsDNA (NoLimits 100 bp DNA Fragment) for *in vitro* experiments were obtained  
370 from Thermo Fisher. Lipopolysaccharide (LPS) and poly (I:C) were purchased from Sigma-  
371 Aldrich (St. Louis, Missouri, USA). Human IFN- $\alpha$ 2a (Roferon) was purchased from Roche. 2'-  
372 3'-cGAMP and c-di-UMP were purchased from Invivogen. EFV was purchased from Bristol-  
373 Myers Squibb.

374

### 375 **Genotyping of PBMCs for rs610913 (Tübingen)**

376 200  $\mu$ l freshly drawn EDTA-anticoagulated venous whole blood (S-Monocette K3 EDTA,  
377 Sarstedt, Hünbrecht, Germany) was subjected to DNA isolation using the QIAamp DNA Blood  
378 Mini Kit on a Qiacube (both from Qiagen) instrument following the manufacturer's  
379 instructions. For genotyping an *MB21DI* rs610913-specific Taqman primer set (Thermo Fisher,  
380 C\_937459\_20), diluted 20x, were used with 20 ng genomic DNA and the appropriate amounts  
381 of TaqMan Universal MasterMix II (Thermo Fisher) in a 10  $\mu$ l reaction volume run in triplicate  
382 wells of a 96 well MicroAmp plate run on a QuantStudio 7 qPCR cycler (Thermo Fisher) and  
383 QuantStudio Real-Time PCR Software v1.3.

384

### 385 **Data Availability**

386 RNA-seq datasets will be deposited at the NCBI GEO database.

387

### 388 **Data presentation and statistical analysis**

389 If not otherwise stated, bars and symbols show the arithmetic mean and error bars the S.E.M of  
390 the indicated number of individual experiments. Statistical significance was calculated by  
391 performing paired Student's t-test using GraphPad Prism 8. *p* values <0.05-0.01 were  
392 considered significant (\*) and <0.01 very significant (\*\*) or not significant (*p*-value  $\geq$ 0.05;  
393 n.s.).



394

## 395 **Results**

### 396 **rs610913 may facilitate HIV-1 acquisition *in vivo***

397 In the human population, the coding region of the cGAS-encoding gene *MB21D1* harbors  
398 several non-synonymous SNPs of different frequencies (**Table 1**). The allele frequencies vary  
399 substantially across populations, with rs610913 being the most frequent non-synonymous SNP  
400 (**Table 1**). We searched for SNPs in *MB21D1* displaying an association with HIV-1 acquisition  
401 using summary statistics covering 6,334 infected cases and 7,247 controls of European ancestry  
402 (23) (**Fig. 1A**). Interestingly, we detected a nominal, however not genome-wide significant  
403 over-representation of rs610913 ( $p=0.004$ ) in HIV-1-infected individuals as compared to the  
404 uninfected control cohort, suggesting that this SNP may associate with and/or facilitate HIV-1  
405 acquisition. Analysing rs610913 in more detail across the six included subgroups, indicated that  
406 the signal was primarily arising from Group 3, a group consisting of North American  
407 individuals and enriched for HIV controllers (23) (**Fig. 1B**). Given its high global frequency  
408 and its potential role in HIV-1 acquisition, we embarked on a functional study of rs610913.

409

### 410 **Structural modeling of cGAS(P<sup>261</sup>H) reveals amino acid position at “head-to-head”** 411 **interface of the cGAS ladder-like assembly**

412 To investigate the structural impact of cGAS(P<sup>261</sup>H) mutation, we built a molecular model of  
413 the hcGAS(P<sup>261</sup>H)•dsDNA assembly in the active (ATP-bound) conformational state. The  
414 overall structure of this assembly is based on the experimental ladder-like cGAS•dsDNA  
415 crystallographic model obtained for the mouse enzyme (mcGAS) (24). The positions of mcGAS  
416 molecules in the ladder-like assembly were substituted by the homology model of the  
417 hcGAS(P<sup>261</sup>H) mutant based on the structure of the wild type hcGAS•dsDNA•ATP complex

418 (PDB-code: 6CTA)(25). The model of hcGAS P<sup>261</sup>H•dsDNA•ATP ladder-like assembly was  
419 optimized, and the geometry of the resulting model (**Fig. 2**) appeared to be very close to the  
420 original mcGAS•dsDNA assembly due to the high structural and sequence similarity (r.m.s.d.  
421 1.0 Å, sequence identity 70%) between the human and mouse enzymes. In the  
422 hcGAS(P<sup>261</sup>H)•dsDNA•ATP ladder-like structure, the H<sup>261</sup> residue is located far away from the  
423 active site in the deep cleft created by the “head-to-head” interface between the two hcGAS  
424 monomers bound to the dsDNA (**Fig. 2**). Another H<sup>261</sup> residue from the neighboring “head-to-  
425 head” hcGAS(P<sup>261</sup>H) molecule is located at the bottom of the same site. Together two imidazole  
426 rings of the H<sup>261</sup> residues create a positively charged surface at the bottom of the “head-to-head”  
427 hcGAS P<sup>261</sup>H cleft (**Fig. 2D**). The distance between the two H<sup>261</sup> residues in the cleft is rather  
428 large (~11 Å), which makes direct interaction between them unlikely. The distances between  
429 H<sup>261</sup> and the two dsDNA molecules (9.3 Å and 15.6 Å) also do not allow direct contact (**Fig.**  
430 **2C**). At the same time, the side chain of H<sup>261</sup> makes two new hydrogen bonds with the side  
431 chains of S<sup>201</sup> and E<sup>259</sup> of the same monomer, which is not possible for the proline side chain  
432 of P<sup>261</sup> in the WT enzyme (**Fig. 2C**). These hydrogen bonds could provide additional  
433 stabilization of cGAS(P<sup>261</sup>H) monomers in the “head-to-head” cleft and may contribute to the  
434 overall stability of the cGAS•dsDNA assembly. Since S<sup>201</sup>, E<sup>259</sup>, and H<sup>261</sup> residues are located  
435 in a solvent-accessible area, the free energy of their interaction may be expected to be  
436 diminished by the solvent effects. Thus, the modelling analysis, indicates that cGAS P<sup>261</sup>H is  
437 not expected to cause a significant discrepancy in enzymatic activity compared to the WT  
438 enzyme, although the overall stability of the multimeric complex with DNA could be affected  
439 slightly.

440

441 **Catalytically active cGAS modulates base-line levels of *IFIT1*, *MX2* and *IFNB1* mRNA**  
442 **expression**

443 In order to address functional consequences that may result from the proline-to-histidine  
444 exchange encoded by rs610913, we stably expressed individual cGAS-GFP variants in THP-1  
445 cGAS KO cells by lentiviral transduction, including cGAS(WT)-GFP, catalytically inactive  
446 cGAS(G<sup>212</sup>A, S<sup>213</sup>A)-GFP (48) and cGAS(P<sup>261</sup>H)-GFP. Assessment of GFP expression by flow  
447 cytometry and of cGAS expression by immunoblotting confirmed similar expression levels of  
448 the transgenes in individual cell lines, as opposed to mock-transduced THP-1 cGAS KO cells  
449 (**Fig. 3A**). Other key components of the cGAS signaling cascade, such as STING, IRF3, and  
450 TREX1, were expressed at similar levels in the four cell lines (**Fig. 3B**), indicating that  
451 abrogation of cGAS expression or of its catalytic activity did not affect mRNA or protein  
452 quantities of gene products involved in this pathway. Interestingly, basal expression of *IFIT1*,  
453 *MX2*, and *IFNBI* mRNA was clearly reduced in cells devoid of cGAS expression and in cells  
454 expressing catalytically inactive cGAS, when compared to cells expressing either WT cGAS or  
455 cGAS(P<sup>261</sup>H) (**Fig. 3C**).

456

#### 457 **Expression of functional cGAS induces global transcriptomic alterations in THP-1 cells**

458 To explore transcriptional profiles associating with expression of individual functional and non-  
459 functional cGAS variants, we subjected total RNA of indicated THP-1 cells to sequencing.  
460 Plotting of all RPKM values >0.5 revealed a high overall correlation in the gene expression  
461 profile between the individual samples (**Fig. 4A**). cGAS(WT) and cGAS(P<sup>261</sup>H) cells (**Fig. 4A,**  
462 **top panel**) shared a similar expression profile. Comparison of cGAS(WT) or cGAS(P<sup>261</sup>H) the  
463 catalytically inactive cGAS(G<sup>212</sup>A/S<sup>213</sup>A) revealed a set of 77 and 115 genes significantly  
464 upregulated exclusively in the context of the functional cGAS variants, respectively, suggesting  
465 that expression of those genes requires cGAS base-level activity (**Fig. 4B, middle and bottom**  
466 **panels**). Interestingly, gene ontology analysis revealed that the genes whose expression was  
467 overrepresented in cGAS(WT) and cGAS(P<sup>261</sup>H)-expressing cells, as compared to cGAS

468 (G<sup>212</sup>A/S<sup>213</sup>A) cells, joined common gene sets, including cellular defense mechanisms to  
469 invading pathogens (GO:0009615 Response to Virus; GO:0051607 Defense Response to Virus)  
470 or type I IFN signaling (GO:0034340 Response to Type I IFN; GO:0060337 Type I IFN  
471 Signaling Pathway) (**Fig. 4C, middle and bottom panels**). In accordance, the fifty most  
472 differentially expressed genes (DEGs) among all significant DEGs in cGAS(WT) compared to  
473 cGAS(G<sup>212</sup>A/S<sup>213</sup>A) samples represented mostly ISGs (43 ISGs out of 50 DEGs), such as  
474 *IFI44L*, *IFI27* and *MXI* or important components of the type I IFN signaling axis, such as  
475 *STAT1* and *IRF7* (**Fig. 4D**). In line with previous experiments, known components or  
476 modulators of the cGAS/STING signaling axis were equally expressed throughout all cell lines,  
477 independent of functional cGAS expression (**Sup. Fig. 1A**).

478         Although the overall transcriptome of cGAS(WT) and cGAS(P<sup>261</sup>H) expressing THP-1  
479 cells appeared very homogenous (**Fig. 4A, top panel**), 67 genes were DEGs which reached  
480 statistical significance (**Fig. 4B, top panel**). These genes, however, displayed low or moderate  
481 expression fold changes and *p*-values. In addition, gene ontology enrichment analysis revealed  
482 enrichment of gene sets with only moderate *p*-values and divergent functions (**Fig. 4C, top**  
483 **panel**), indicating that expression of cGAS(P<sup>261</sup>H) does not severely modulate the cellular  
484 transcriptome. We selected ten candidate genes based on fold change and statistical significance  
485 (**Sup. Fig. 1B**) and evaluated their expression by Q-RT-PCR (**Sup. Fig. 1 C**), aiming at  
486 challenging the findings obtained with RNA sequencing. In line with the rather subtle  
487 differences in the transcriptomes of cGAS(WT) and cGAS(P<sup>261</sup>H)-expressing cells, analysis of  
488 several independent samples by Q-RT-PCR confirmed only *TCP-1* out of the ten tested  
489 candidate genes as a true DEG whose expression is specifically increased in the context of  
490 cGAS(P<sup>261</sup>H) expression, thus displaying lower mRNA levels in cGAS(WT)-expressing cells.

491         In summary, the transcriptomic data provide further evidence for a base-line antiviral  
492 immunity in cells expressing functional cGAS(WT) or cGAS(P<sup>261</sup>H), and both cGAS variants

493 control an overall highly similar cellular transcriptome. In contrast, the absence of cGAS  
494 expression or expression of a functionally inactive cGAS mutant decreased the antiviral state  
495 of the cell as reflected by lower expression of genes related to virus defense and the type I IFN  
496 response.

497

498 **cGAS(WT) and cGAS(P<sup>261</sup>H) expression reduces susceptibility to lentiviral transduction**  
499 **in the absence of transduction-provoked innate immune responses**

500 Since rs610913 may associate with increased probability of HIV-1 infection *in vivo*, we next  
501 investigated whether expression of cGAS(P<sup>261</sup>H) renders cells more susceptible to infection by  
502 HIV-1 and other viruses. Specifically, we challenged THP-1 cGAS KO cells reconstituted with  
503 cGAS(WT), cGAS(G<sup>212</sup>A/S<sup>213</sup>A) or cGAS(P<sup>261</sup>H) with VSV-G-pseudotyped lentiviral particles  
504 or HIV-1 NL4.3 and monitored the transduction efficiency. Interestingly, cells devoid of cGAS  
505 expression or expressing the catalytically inactive mutant displayed higher susceptibility to  
506 lentiviral transduction as compared to cGAS(WT) or cGAS(P<sup>261</sup>H)-expressing counterparts  
507 (**Fig. 5A-B**). However, cGAS(WT) and cGAS(P<sup>261</sup>H)-expressing cells shared identical  
508 susceptibility to lentiviral transduction.

509       Importantly, transduction of cells with ablated cGAS expression or expressing  
510 individual cGAS variants did neither induce expression of *IFIT1*, *MX2* and *IFNB* mRNAs, nor  
511 secretion of bioactive IFN into the culture supernatant in an EFV-sensitive fashion (**Fig. 5C**).  
512 Lentiviral transduction triggered induction of *IFIT1* mRNA expression to a maximum of 2.9 to  
513 7.1-fold in all four cell lines, irrespective of their cGAS expression status or EFV treatment.  
514 These results are consistent with absence of cGAS-mediated responses to lentiviral infection  
515 reported by others (9, 11) and us (10), suggesting that detectable differences in the susceptibility  
516 of our cell lines to transduction are linked to different antiviral states.

517

518 **Base-line antiviral state mediated by cGAS(WT) and cGAS(P<sup>261</sup>H) expression renders**  
519 **cells less susceptible to HSV-1 and CHIKV infection**

520 To explore the role of cGAS in the context of infection with other viruses displaying  
521 individual replication strategies and genomic architectures, we reconstituted HEK293T, that  
522 lack detectable cGAS and STING expression, and HEK293T mCherry-STING cells (1) with  
523 individual cGAS variants (**Sup Fig. 2 A-B**). In line with results obtained in THP-1 cells,  
524 expression of STING, IRF3, and TREX1 was not affected by complementation of cGAS  
525 expression in HEK293T cells (**Sup Fig. 2 C-D**). Reconstitution with both cGAS and STING  
526 expression restored the cGAS-dependent base-level induction of *IFIT1*, *MX2* and *IFNB1*  
527 expression in HEK293T cells, indicating the intactness of the remaining signaling pathway in  
528 HEK293T cells (**Sup Fig. 2E**). Based on these observations, we considered cGAS/STING-  
529 expressing HEK293T cells as a suitable model to monitor cGAS-dependent restriction of viral  
530 infections. As a prototypic DNA virus, we used an HSV-1 strain that encodes a truncated  
531 version of pUL41, a well-characterized cGAS antagonist (6, 36). Cells expressing cGAS(WT)  
532 or cGAS(P<sup>261</sup>H) were less susceptible to infection with HSV-1  $\Delta UL41N$ . Their rate of HSV-1  
533 Vp5-positive cells scored to 46.7% and 43.8%, respectively, as opposed to 61.7% in  
534 cGAS(G<sup>212</sup>A/S<sup>213</sup>A)-expressing cells and 56.8% in cGAS-negative cells (**Fig. 6A**). Strikingly,  
535 the same pattern was observed in the context of Chikungunya virus (CHIKV) strain 181/25, an  
536 RNA virus (**Fig. 6B**). Here, cGAS(WT) or cGAS(P<sup>261</sup>H)-expressing cells displayed luciferase  
537 reporter expression of 5.180 and 5.177 RLU, respectively, as compared to cGAS(G<sup>212</sup>A/S<sup>213</sup>A)-  
538 expressing cells that yielded a mean value of 16.760 RLU. Together, these data support the idea  
539 that cGAS maintains a base-line antiviral milieu that acts in a broad manner against invading  
540 viral pathogens. Conclusively, beyond sensing viral DNA intermediates or stress-induced host  
541 DNA released from intracellular compartments in the during an ongoing infection, cGAS

542 expression and steady-state activity may maintain a static antiviral state that represents a hurdle  
543 for viral infections that are sensitive to the cGAS-controlled antiviral ISG program.

544

#### 545 **cGAS(P<sup>261</sup>H) may display a slightly reduced DNA sensing ability**

546 We next investigated the functionality of cGAS-mediated DNA-sensing and induction of the  
547 type I IFN response of THP-1 cells expressing cGAS(P<sup>261</sup>H) as compared to cGAS(WT) by  
548 quantifying the type I IFN response provoked upon electroporation with endotoxin-free plasmid  
549 DNA. Of note, human cGAS is efficiently activated upon binding to long dsDNA, as opposed  
550 to binding to short DNA fragments (24)(25). Electroporation of plasmid DNA resulted in the  
551 release of bioactive IFN at concentrations of 11,158 IU/ml and 33,652 IU/ml into supernatants  
552 of cells expressing cGAS(WT) or cGAS(P<sup>261</sup>H), respectively (**Fig. 7A**). In contrast, cGAS KO  
553 cells and cells expressing the inactive cGAS(G<sup>212</sup>A/S<sup>213</sup>A) mutant barely responded to plasmid  
554 DNA challenge and displayed responses that did not exceed the levels of mock-electroporated  
555 cells. Electroporation with the STING agonist cGAMP, but not the control cyclic dinucleotide  
556 c-di-UMP, induced release of similar levels of bioactive IFNs in all tested cell lines, indicating  
557 the intactness of the STING signaling axis (**Fig. 7A**). Similarly, phosphorylation of STING,  
558 TBK1, and IRF3 upon plasmid DNA challenge was detectable as early as 0.5 and 1 hour post  
559 plasmid DNA challenge in cells expressing cGAS(WT) and cGAS(P<sup>261</sup>H), whereas lysates  
560 from both THP-1 cGAS KO cells and THP-1 cells expressing cGAS (G<sup>212</sup>A/S<sup>213</sup>A) scored  
561 negative in this assay, as expected (**Fig. 7B**). While the quality and kinetics of the type I IFN  
562 response upon challenge with a fixed plasmid copy number did not reveal gross differences  
563 between cGAS(WT) and cGAS(P<sup>261</sup>H), titration of plasmid DNA uncovered a slightly inferior  
564 ability of cGAS(P<sup>261</sup>H) over cGAS(WT) to induce *IFIT1* mRNA expression (**Fig. 7C**), but not  
565 release of bioactive IFNs in the cell culture supernatant (**Fig. 7D**). To unravel potentially  
566 different inherent catalytic activities of cGAS(WT) and cGAS(P<sup>261</sup>H), both proteins were

567 expressed in *E. coli*, purified and incubated with dsDNA fragments of 1, 4 or 6 kb length in the  
568 presence of ATP and GTP. Both proteins presented similar *in vitro* enzymatic activities as  
569 judged by 2'-3-cGAMP quantification by LC-MS/MC, with a trend towards higher cGAMP  
570 production by cGAS(P<sup>261</sup>H) as compared to cGAS(WT) (**Fig. 7E**). For both cGAS variants, the  
571 enzymatic activity increased with augmenting dsDNA length, in accordance with other reports  
572 on cGAS(WT) (24, 49). In summary, while our *in vitro* data seem to suggest a slightly inferior  
573 *in vitro* catalytic activity of cGAS(WT) as compared to cGAS(P<sup>261</sup>H), our functional data in  
574 cells indicate a slightly superior sensitivity of the WT protein to DNA that manifests at  
575 suboptimal DNA quantities.

576

577 **rs610913 homozygosity results in a trend towards a lower cell-intrinsic response to**  
578 **plasmid DNA, but not to LPS and poly(I:C) challenge**

579 According to data from the 1000 genomes project (22), the SNP rs610913 displays an allele  
580 frequency of 35.6 to 63.1% in humans. PBMCs from a cohort of healthy individuals were  
581 isolated and stratified upon genotyping of corresponding whole blood. Steady-state *IFIT1*  
582 mRNA expression levels were similar in PBMCs from individuals homozygous for the WT  
583 variant and individuals homozygous for rs610913 (**Fig. 8A**). *IFIT1* mRNA expression was  
584 slightly, but non-significantly, increased in the rs610913 SNP group compared to the  
585 cGAS(WT) group after both LPS and poly(I:C) challenge (**Fig. 8B**). In contrast, plasmid DNA  
586 challenge revealed a slightly decreased *IFIT1* mRNA expression in the rs610913 SNP group  
587 compared to the cGAS(WT) group. These data point towards the possibility of a slightly  
588 impaired DNA sensing ability in the context of the cGAS(P<sup>261</sup>H)-encoding rs610913 gene  
589 variant.

590

591 **Discussion**



592           This study aimed at characterizing the impact of a single amino acid exchange, proline-  
593 to-histidine at position 261 of the cGAS protein. The SNP rs610913 encoding for cGAS(P<sup>261</sup>H)  
594 attracted our attention because of its high allele frequency. With the exception of the protective  
595 deleting polymorphism in the *CCR5* gene (*CCR5Δ32*), little genetic contribution on HIV  
596 acquisition was identified in previous genome-wide association studies (23, 50). The mild  
597 apparent overrepresentation of the rs610913 allele in HIV-1-positive individuals prompted us  
598 to hypothesize that it associates with a higher risk of HIV-1 acquisition. Of note, rs610913  
599 appeared to be enriched in BCG-vaccinated healthy controls compared to TB-positive  
600 vaccinated individuals, suggesting an association of rs610913 with BCG vaccine-mediated  
601 protection to TB infection (51). Given the lack of additional data on rs610913, we aimed at  
602 evaluating its role *in vitro*, *in cellulo* and *ex vivo*.

603           Interestingly, we first detected a strong association of cGAS expression and  
604 maintenance of base-level innate immunity, in the absence of infection or external stimuli. Both  
605 the expression of individual tested ISGs, and the global transcriptomic profile shifted  
606 significantly towards an antiviral state in THP-1 cGAS KO cells upon restoration of cGAS  
607 expression. This observation was corroborated in HEK293T cells equipped with both cGAS  
608 and STING expression. Also, components of the IFN signaling cascade, such as *STAT1* and  
609 *IRF7*, were expressed at higher levels in the presence of functional cGAS, potentially allowing  
610 bystander cells to mount more rapid paracrine responses. This observation is reminiscent of our  
611 previous findings in mouse CD4<sup>+</sup> T-cells, which equally displayed a cGAS-dependent ISG  
612 expression profile in the absence of exogenous stimuli (10). Work by other groups linked the  
613 cGAS-mediated priming of innate immunity to the release and sensing of mitochondrial DNA  
614 as response to cellular stress (52, 53), a pathway that can be triggered by both DNA or RNA  
615 virus infection (16, 52, 54) and to the base-line sensing of endogenous retroviruses. It is  
616 therefore conceivable that cGAS-mediated activity may not only target viruses with dsDNA

617 genomes or DNA intermediates, but also RNA viruses. Along this line, several RNA viruses  
618 indeed evolved strategies to actively counteract the cGAS/STING signaling axis (17, 55).

619         However, comparison of cells expressing cGAS(P<sup>261</sup>H) and cGAS(WT) protein failed  
620 to reveal pronounced differences in their ability to maintain a base-line innate immunity in any  
621 experimental system we studied, suggesting a similar efficiency of cGAS(P<sup>261</sup>H) enzymatic  
622 function, at least at steady-state conditions. At base-line levels, we identified a differential  
623 regulation of *TCP-1*, which encodes for a molecular chaperone that is part of the TRiC complex  
624 (56). Upon challenge with high amounts of plasmid DNA, cells expressing either cGAS(WT)  
625 or cGAS(P<sup>261</sup>H) supported a robust release of similar concentrations of bioactive IFNs, as  
626 opposed to cells expressing the non-functional cGAS mutant and cGAS KO cells. Also, kinetics  
627 of phosphorylation of STING, TBK1 and IRF3 were similar in cGAS(P<sup>261</sup>H) and cGAS (WT)-  
628 expressing cells. In the context of challenge with suboptimal DNA quantities, induction of  
629 *IFIT1* mRNA expression was significantly reduced in cGAS(P<sup>261</sup>H)-expressing cells compared  
630 to cGAS(WT) cells. Likewise, PBMCs from homozygous rs610913 carriers displayed a trend  
631 towards reacting at lower magnitudes to DNA challenge than cells from homozygous WT allele  
632 carriers. These data point towards a possibly reduced DNA binding affinity of cGAS(P<sup>261</sup>H) or  
633 differential requirement of cGAS cofactor interaction. The latter idea is supported by the results  
634 of our molecular modeling attempts, which hinted towards the possibility of a potential  
635 additional co-factor binding site in the cGAS(P<sup>261</sup>H) protein. The topology and the surface  
636 charge distribution of the “head-to-head” hcGAS(P<sup>261</sup>H) cleft containing the two H<sup>261</sup> residues  
637 create a favorable binding site for a potential cellular co-factor that might increase the stability  
638 of the hcGAS P<sup>261</sup>H•dsDNA ladder-like assembly *in vivo*. This stability increase would  
639 contribute to the nucleation-cooperativity-based mechanism of cGAS (24) and enhanced  
640 enzymatic activity. The latter is supported by the observation that a slightly higher *in vitro*  
641 catalytic activity of cGAS(P<sup>261</sup>H) can be attributed to the additional stabilization of the “head-

642 to-head” area by the two hydrogen bonds between H<sup>261</sup> and the side-chains of S<sup>201</sup> and E<sup>259</sup> of  
643 the same monomer, which are absent in the WT enzyme. Besides, the presence of two histidine  
644 residues in the cleft makes this site more suitable for specific recognition and high-affinity  
645 binding compared to proline. Intriguingly, a previous report suggested a loss of helix and  
646 glycosylation of the mutated cGAS(P<sup>261</sup>H) protein, and a better capacity for binding interactions  
647 (51).

648 Individual expression of cGAS(WT) or cGAS(P<sup>261</sup>H) conferred a decreased  
649 susceptibility to VSV-G-pseudotyped lentiviral vector-mediated and HIV-1 transduction. This  
650 inhibition occurred in the absence of detectable induction of an innate immune response upon  
651 transduction. These data support the idea that cGAS-induced base-line antiviral state of the  
652 cells, rather than cGAS-mediated detection of viral DNA intermediates or infection-triggered  
653 release of mtDNA, is responsible for lower transduction efficiencies. Of note, the absence of  
654 innate immune activation upon HIV-1 infection has been linked to the intactness of viral capsids  
655 that permit capsid uncoating closely tied to nuclear pores or in proximity to integration sites  
656 within the nucleus, thereby preventing exposure of HIV-1 RT products to cytosolic DNA  
657 sensors (11, 12, 57, 58). In line with our working model, cGAS expression reduced  
658 susceptibility also to infection with HSV-1 and CHIKV, an RNA virus. Schoggins and  
659 colleagues proposed cGAS-mediated inhibition of RNA virus infection through exerting an  
660 IRF3-dependent but STAT-independent mechanism (15). Alphaviruses including CHIKV are  
661 sensitive to STING/IRF3-mediated restriction of infection (59, 60). In contrast, herpesvirus  
662 infection can be accompanied by accidental leakage of viral DNA into the cytosol, allowing  
663 cGAS-mediated recognition of the viral nucleic acids and subsequent type I IFN responses (61,  
664 62). Although we detected a protective role of functional cGAS in our experiments, we failed  
665 to establish a specific phenotype of cGAS(WT) compared to the cGAS(P<sup>261</sup>H) variant,

666 indicating that both proteins' expression establishes a cellular antiviral state that sufficiently  
667 restricts infection by diverse viruses.

668 In conclusion, we demonstrate the overall intact functionality of rs610913 SNP-encoded  
669 cGAS(P<sup>261</sup>H). This protein, similarly to cGAS(WT) mounts an efficient IFN response upon  
670 sensing of dsDNA and decreases susceptibility to infection by different viruses by maintenance  
671 of a cGAS-dependent, base-line expression of multiple antiviral factors.

672

### 673 **Acknowledgments**

674 We thank Sandra Pelligrini, Veit Hornung, and Jens Bohne for the kind gift of the HL116 cell  
675 line, THP-1 cGAS KO cells, and HEK293T-mcherry-STING, and HEK293T cells,  
676 respectively. We thank Oya Cingöz for providing the plasmid HIV-1 NL4.3 ΔEnv ΔVpr  
677 luciferase. We thank Victor Tarabykin for granting access to the Step One Plus Real-Time PCR  
678 System at Charité Universitätsmedizin. We thank the Genomics platform of the Berlin Institute  
679 of Health for NGS. We thank Rune Hartmann and Andreas Holleufer for their help with the *in*  
680 *vitro* activity experiments. We are very grateful to Dietmar Manstein, Rune Hartmann, and  
681 Karl-Peter Hopfner for many fruitful discussions. We thank Thomas Pietschmann and Christian  
682 Drosten for their constant support. We thank the HIV Reagent Program for providing essential  
683 reagents. We thank Sabine Dickhöfer for genotyping support and technical assistance. We thank  
684 all study subjects and their families, as well as voluntary healthy blood donors for participating  
685 in the study. J.K. is supported by the Center of Infection Biology and Immunity (ZIBI). This  
686 work was supported by a postdoctoral fellowship from the Foundation Ernst & Margarete  
687 Wagemann to A.D., by funding from German Research Foundation (Deutsche  
688 Forschungsgemeinschaft, DFG) to C.G. (Collaborative Research Centre SFB900 “Microbial  
689 Persistence and its Control”, Project number 158989968, project C8 and Priority Programm  
690 1923 “Innate Sensing and Restriction of Retroviruses”, GO2153/4 grant) and to B.S. (SFB900

691 158989968; project C2; EXC2155 RESIST 390874280; So 403/6-1), by funding from  
692 Boehringer Ingelheim Foundation (Exploration Grant) to C.G., funding of the Helmholtz  
693 Center for Infection Research (HZI) and of Berlin Institute of Health (BIH) to C.G. R.F., X.Z  
694 and O.Z. were supported by German Research Foundation grant FE 1510/2-1 and EXC 2155  
695 “RESIST” – Project ID 39087428. ANRW was supported by the Else-Kröner-Fresenius  
696 Stiftung, the University Hospital Tübingen, the University of Tübingen, the DFG Clusters of  
697 Excellence "iFIT – Image-Guided and Functionally Instructed Tumor Therapies" (EXC 2180,  
698 also to MWL) and “CMFI – Controlling Microbes to Fight Infection (EXC 2124). Gefördert  
699 durch die Deutsche Forschungsgemeinschaft (DFG) im Rahmen der Exzellenzstrategie des  
700 Bundes und der Länder - EXC 2180 and EXC 2124.

701

702

703

704

705

## 706 **Author Contributions**

707 JK, CE, SX, CG designed research.

708 JK, CE, KD, SX, AD, FP, JJ, OZ, XZ, RF performed research.

709 MWL and ANRW were involved in sample acquisition

710 JK, CE, SX, AD, FP, CWB, OZ, XZ, RF, JF, ANRW, BS, CG analyzed data.

711 CE, KD, CWB, RF, ANRW, BS contributed to writing the manuscript.

712 JK and CG wrote the paper.

713

## 714 **Legends**

715 **FIGURE 1. rs610913 may facilitate HIV-1 acquisition *in vivo***

716 (A) Regional association plot of the *MB21D1* region, containing all SNPs included in the meta-  
717 analysis and their respective p-values. The plot is centered on rs610913 (purple diamond), with  
718 red dots indicating SNPs in high linkage disequilibrium (LD) ( $r^2 > 0.8$ ), and green and light blue  
719 dots representing SNPs in moderate or low LD. All SNPs in high LD with rs610913 are  
720 synonymous SNPs. (B) Forest plot of the odds ratios (OR) for rs610913 with 95% confidence  
721 intervals across all subgroups and after meta-analysis (diamond) within the ICGH GWAS of  
722 HIV-1 acquisition. The number of cases and controls are indicated for each group along with  
723 their respective odds ratios.

724

725 **FIGURE 2. Structural model of cGAS(P<sup>261</sup>H) reveals amino acid position at “head-to-  
726 head” interface of the cGAS-ladder-like assembly**

727 (A) and (B) The structural model of human cGAS(P<sup>261</sup>H)•dsDNA oligomeric assembly created  
728 using the ladder-like crystal structure of mouse cGAS in complex with dsDNA (PDB-ID: 5N6I)  
729 and the structure of the hcGAS(WT)•dsDNA•ATP complex (PDB-ID: 6CTA) as starting  
730 coordinates. The cGAS(P<sup>261</sup>H) monomers are shown in blue, yellow, magenta, grey, cyan, and  
731 green. The two dsDNA molecules are shown in orange and red. The residues H<sup>261</sup> in the  
732 cGAS(P<sup>261</sup>H) monomers are represented with a Corey-Pauling-Koltun (CPK) model with the  
733 corresponding colors. The ATP binding sites are indicated using molecular surface  
734 representation.

735 (C) Detailed view of H<sup>261</sup> localization. The closest distances between H<sup>261</sup> residues and the  
736 dsDNA molecules are shown with dotted black lines. The hydrogen bonds between H<sup>261</sup>, S<sup>201</sup>,  
737 and E<sup>259</sup> are traced with red circles. The close-up panel in the black box shows the comparison  
738 of H<sup>261</sup> and P<sup>261</sup> side-chain structures.

739 **(D)** Molecular surface representation of the “head-to-head” interface cleft between the two  
740 cGAS(P<sup>261</sup>H) monomers bound to the dsDNA molecules. The semitransparent surface is  
741 colored according to the molecular electrostatic potential with positive, negative, and neutral  
742 charges represented by the blue, red, and white colors, respectively. The residues H261 are  
743 shown using the CPK model representation.

744

745 **FIGURE 3. Catalytically active cGAS modulates base-line levels of *IFIT1*, *MX2* and**  
746 ***IFNB1* mRNA expression**

747 **(A-C)** THP-1 cGAS KO cells were stably transduced with indicated GFP-cGAS variants and  
748 analysed for:

749 **(A)** Percentage of GFP-positive cells and steady-state cGAS protein expression by flow  
750 cytometry and immunoblotting, respectively.

751 **(B)** Relative expression of *STING*, *IRF3* and *TREX1* mRNA by quantitative RT-PCR and  
752 immunoblotting of indicated proteins.

753 **(C)** Relative *IFIT1*, *MX2* and *IFNB1* mRNA expression levels by quantitative RT-PCR.

754 Error bars indicate S.E.M from  $\geq$  three independent experiments. Immunoblots shown are  
755 representative blots of two or more.

756

757 **FIGURE 4. Expression of functional cGAS induces global transcriptomic alterations in**  
758 **THP-1 cells**

759 **(A-D)** Bulk RNA sequencing analysis was conducted with total RNA extracted from THP-1  
760 cGAS KO cells stably expressing indicated cGAS variants.

761 **(A)** Plot of all raw RPKM values  $> 0.5$  of the indicated samples.

762 **(B)** Identification of differentially expressed genes in cGAS (WT) vs cGAS (P<sup>261</sup>H), cGAS  
763 (WT) vs cGAS (G<sup>212</sup>A/S<sup>213</sup>A) or cGAS (P<sup>261</sup>H) vs cGAS (G<sup>212</sup>A/S<sup>213</sup>A) samples by plotting the

764 gene expression fold change and  $p$ -values of all differentially expressed genes. Genes with a  $p$ -  
765 value  $< 0.05$  and more than two-fold change are highlighted in blue.

766 (C) Gene ontology analysis of genes significantly upregulated in cGAS (P<sup>261</sup>H) vs cGAS (WT),  
767 cGAS (WT) vs cGAS (G<sup>212</sup>A/S<sup>213</sup>A) or cGAS (P<sup>261</sup>H) vs cGAS (G<sup>212</sup>A/S<sup>213</sup>A) expressing cells.

768 (D) Heatmap showing the RPKM values of the 50 DEGs of highest absolute fold change of all  
769 statistically significant ( $p < 0,05$ ) DEGs in cGAS(WT) vs cGAS(G<sup>212</sup>A/S<sup>213</sup>A) samples. Genes  
770 are ranked based on their absolute fold change.

771

772 **FIGURE 5. cGAS(WT) and cGAS(P<sup>261</sup>H) expression reduces susceptibility to lentiviral**  
773 **transduction in the absence of transduction-provoked innate immune responses**

774 (A) THP-1 cells were transduced with VSV-G-pseudotyped lentiviral vectors and analyzed for  
775 luciferase reporter expression 72 hours post transduction (n = 5).

776 (B) THP-1 cells were infected with VSV-G-pseudotyped HIV-1 NL4.3 luciferase and luciferase  
777 reporter expression was analyzed 72 hours post transduction (n = 2).

778 (C) Indicated THP-1 cells were transduced with VSV-G-pseudotyped lentiviral vectors in the  
779 presence or absence of the reverse transcriptase inhibitor Efavirenz (EFV). Shown is *IFIT1*,  
780 *MX2* and *IFNB* mRNA expression and the release of bioactive IFNs in cell culture supernatants  
781 at the indicated time points (n = 3).

782

783 **FIGURE 6. Base-line antiviral state mediated by cGAS(WT) and cGAS(P<sup>261</sup>H) expression**  
784 **renders cells less susceptible to HSV-1 and CHIKV infection**

785 (A) 293T mCherry-STING cells stably expressing cGAS variants were challenged with HSV-  
786 1  $\Delta$ *UL41N* followed by quantification of intracellular HSV-1 Vp5 protein expression by flow  
787 cytometry.



788 **(B)** 293T mCherry-STING cells stably expressing cGAS variants were infected with CHIKV  
789 181/25 luciferase reporter strain followed by luciferase detection 48 hours post infection.  
790 Error bars indicate S.E.M. from  $\geq 3$  individual experiments.

791

792 **FIGURE 7. cGAS(P<sup>261</sup>H) may display a slightly reduced DNA sensing ability in THP-1**  
793 **cells**

794 **(A)** Indicated THP-1 cells were electroporated with plasmid DNA (12  $\mu$ g), c-di-UMP (6  $\mu$ g),  
795 cGAMP (6  $\mu$ g) or mock-electroporated. Shown is the release of bioactive IFNs in cell culture  
796 supernatants.

797 **(B)** Immunoblotting of indicated total and phosphorylated proteins were performed using  
798 lysates from indicated THP-1 cells electroporated with plasmid DNA (12  $\mu$ g) or mock-  
799 electroporated and collected at indicated time points post challenge. One representative blot of  
800 two is shown.

801 **(C)** *IFIT1* mRNA expression of indicated THP-1 cells electroporated with increasing amounts  
802 of plasmid DNA.

803 **(D)** Release of bioactive IFNs in cell culture supernatant indicated THP-1 cells electroporated  
804 with increasing amounts of plasmid DNA.

805 **(E)** The *in vitro* activity of purified cGAS (WT) and cGAS(P<sup>261</sup>H) proteins in the presence of  
806 dsDNA fragments of various lengths (1, 4, and 6 kb) is shown. The *in vitro* activity was  
807 measured in terms of 2'3'cGAMP production by cGAS incubated with its substrates ATP and  
808 GTP. Error bars indicate S.E.M of two experiments performed with two individual protein  
809 purifications.

810 If not otherwise stated error bars indicate S.E.M. from three individual experiments. n.d. = not  
811 detectable; p.e. = post electroporation.

812

813 **FIGURE 8. rs610913 homozygosity results in a trend towards a lower cell-intrinsic**  
814 **response to plasmid DNA, but not to LPS and poly(I:C) challenge**

815 IL-2/PHA-stimulated PBMCs from healthy donors with indicated genotype were analyzed in  
816 respect to:

817 (A) Basal level *IFIT1* mRNA expression of IL-2/PHA-stimulated PBMCs.

818 (B) *IFIT1* mRNA expression in IL-2/PHA-stimulated PBMCs upon poly(I:C), LPS or plasmid  
819 DNA challenge.

820 The symbols indicate individual donors. Error bars display S.E.M.

821

822 **Table 1. Allele frequency of most abundant, non-synonymous SNPs in the cGAS-encoding**  
823 **gene *MB21D1***

824 Shown are the respective single nucleotide exchange, resulting amino acid substitution and  
825 relative allele frequencies of the reference and alternative alleles in the African, European and  
826 global populations.

827

828 **SUPPLEMENTAL FIGURE 1. Transcriptomic Analysis of THP-1 cells stably expressing**  
829 **cGAS variants**

830 (A) Heatmap showing the raw RPKM values of genes involved in the cGAS/STING signaling  
831 axis.

832 (B) Plot of differential expressed genes in cGAS(WT) vs cGAS(P<sup>261</sup>H) samples. Genes that  
833 were verified by RT-Q-PCR are highlighted in red.

834 (C) C<sub>T</sub> values of selected genes normalized to RNASEP expression tested by RT-Q-PCR.

835

836

837

838 **SUPPLEMENTAL FIGURE 2. HEK293T cells reconstituted with cGAS and STING**  
839 **display a cGAS-specific ISG expression profile**

840 (A) HEK293T cells stably expressing mCherry-STING were reconstituted with individual  
841 cGAS-GFP variants. GFP expression was monitored using Flow Cytometry.

842 (B) HEK293T cells that lack endogenous STING expression were reconstituted with cGAS-  
843 GFP variants and GFP expression was quantified using Flow Cytometry.

844 (C) Immunoblot analysis of indicated HEK293T cell lysates. One representative blot of two is  
845 shown.

846 (D) Expression of *STING*, *IRF3* and *TREX1* mRNA in indicated HEK293T mCherry-STING  
847 cells was quantified by RT-Q-PCR and normalized to *RNASEP* mRNA expression.

848 (E) Base line mRNA expression of *IFIT1*, *MX2* and *IFNB1* in indicated cells analyzed by RT-  
849 Q-PCR and normalized to *RNaseP* mRNA expression.

850 Error bars indicated S.E.M. from  $\geq 3$  individual experiments.

851

852 **REFERENCES**

- 853 1. Ablasser, A., M. Goldeck, T. Cavlar, T. Deimling, G. Witte, I. Röhl, K.-P. Hopfner, J.  
854 Ludwig, and V. Hornung. 2013. cGAS produces a 2'-5'-linked cyclic dinucleotide second  
855 messenger that activates STING. *Nature* 498: 380–384.
- 856 2. Gao, P., M. Ascano, Y. Wu, W. Barchet, B. L. Gaffney, T. Zillinger, A. A. Serganov, Y.  
857 Liu, R. A. Jones, G. Hartmann, T. Tuschl, and D. J. Patel. 2013. Cyclic [G(2',5')pA(3',5')p]  
858 is the metazoan second messenger produced by DNA-activated cyclic GMP-AMP synthase.  
859 *Cell* 153: 1094–1107.

- 860 3. Stempel, M., B. Chan, and M. M. Brinkmann. 2019. Coevolution pays off: Herpesviruses  
861 have the license to escape the DNA sensing pathway. *Med. Microbiol. Immunol.* 208: 495–  
862 512.
- 863 4. Ma, Z., S. R. Jacobs, J. A. West, C. Stopford, Z. Zhang, Z. Davis, G. N. Barber, B. A.  
864 Glaunsinger, D. P. Dittmer, and B. Damania. 2015. Modulation of the cGAS-STING DNA  
865 sensing pathway by gammaherpesviruses. *Proc. Natl. Acad. Sci.* 112: E4306 LP-E4315.
- 866 5. Zhu, H., and C. Zheng. 2020. The Race between Host Antiviral Innate Immunity and the  
867 Immune Evasion Strategies of Herpes Simplex Virus 1. *Microbiol. Mol. Biol. Rev.* 84.
- 868 6. Su, C., and C. Zheng. 2017. Herpes Simplex Virus 1 Abrogates the cGAS/STING-  
869 Mediated Cytosolic DNA-Sensing Pathway via Its Virion Host Shutoff Protein, UL41. *J.*  
870 *Viol.* 91.
- 871 7. Christensen, M. H., S. B. Jensen, J. J. Miettinen, S. Luecke, T. Prabakaran, L. S. Reinert, T.  
872 Mettenleiter, Z. J. Chen, D. M. Knipe, R. M. Sandri-Goldin, L. W. Enquist, R. Hartmann, T.  
873 H. Mogensen, S. A. Rice, T. A. Nyman, S. Matikainen, and S. R. Paludan. 2016. HSV-1  
874 ICP27 targets the TBK1-activated STING signalsome to inhibit virus-induced type I  
875 IFN expression. *EMBO J.* 35: 1385–1399.
- 876 8. Bodda, C., L. S. Reinert, S. Fruhwürth, T. Richardo, C. Sun, B.-C. Zhang, M. Kalamvoki,  
877 A. Pohlmann, T. H. Mogensen, P. Bergström, L. Agholme, P. O'Hare, B. Sodeik, M. Gyrd-  
878 Hansen, H. Zetterberg, and S. R. Paludan. 2020. HSV1 VP1-2 deubiquitinates STING to  
879 block type I interferon expression and promote brain infection. *J. Exp. Med.* 217.
- 880 9. Cingöz, O., and S. P. Goff. 2019. HIV-1 Is a Poor Inducer of Innate Immune Responses.  
881 *MBio* 10: e02834-18.
- 882 10. Elsner, C., A. Ponnurangam, J. Kazmierski, T. Zillinger, J. Jansen, D. Todt, K. Döhner, S.

- 883 Xu, A. Ducroux, N. Kriedemann, A. Malassa, P.-K. Larsen, G. Hartmann, W. Barchet, E.  
884 Steinmann, U. Kalinke, B. Sodeik, and C. Goffinet. 2020. Absence of cGAS-mediated type I  
885 IFN responses in HIV-1-infected T cells. *Proc. Natl. Acad. Sci. U. S. A.* 117: 19475–19486.
- 886 11. Siddiqui, M. A., A. Saito, U. D. Halambage, D. Ferhadian, D. K. Fischer, A. C. Francis,  
887 G. B. Melikyan, Z. Ambrose, C. Aiken, and M. Yamashita. 2019. A Novel Phenotype Links  
888 HIV-1 Capsid Stability to cGAS-Mediated DNA Sensing. *J. Virol.* 93: e00706-19.
- 889 12. Sumner, R. P., L. Harrison, E. Touizer, T. P. Peacock, M. Spencer, L. Zuliani-Alvarez,  
890 and G. J. Towers. 2020. Disrupting HIV-1 capsid formation causes cGAS sensing of viral  
891 DNA. *EMBO J.* 39: e103958.
- 892 13. Yan, N., A. D. Regalado-Magdos, B. Stiggelbout, M. A. Lee-Kirsch, and J. Lieberman.  
893 2010. The cytosolic exonuclease TREX1 inhibits the innate immune response to human  
894 immunodeficiency virus type 1. *Nat. Immunol.* 11: 1005–1013.
- 895 14. Kumar, S., J. H. Morrison, D. Dingli, and E. Poeschla. 2018. HIV-1 Activation of Innate  
896 Immunity Depends Strongly on the Intracellular Level of TREX1 and Sensing of Incomplete  
897 Reverse Transcription Products. *J. Virol.* 92: e00001-18.
- 898 15. Schoggins, J. W., D. A. MacDuff, N. Imanaka, M. D. Gainey, B. Shrestha, J. L. Eitson, K.  
899 B. Mar, R. B. Richardson, A. V Ratushny, V. Litvak, R. Dabelic, B. Manicassamy, J. D.  
900 Aitchison, A. Aderem, R. M. Elliott, A. García-Sastre, V. Racaniello, E. J. Snijder, W. M.  
901 Yokoyama, M. S. Diamond, H. W. Virgin, and C. M. Rice. 2014. Pan-viral specificity of IFN-  
902 induced genes reveals new roles for cGAS in innate immunity. *Nature* 505: 691–695.
- 903 16. Moriyama, M., T. Koshiba, and T. Ichinohe. 2019. Influenza A virus M2 protein triggers  
904 mitochondrial DNA-mediated antiviral immune responses. *Nat. Commun.* 10: 4624.
- 905 17. Webb, L. G., J. Veloz, J. Pintado-Silva, T. Zhu, M. V Rangel, T. Mutetwa, L. Zhang, D.

- 906 Bernal-Rubio, D. Figueroa, L. Carrau, R. Fenutria, U. Potla, S. P. Reid, J. S. Yount, K. A.  
907 Stapleford, S. Aguirre, and A. Fernandez-Sesma. 2020. Chikungunya virus antagonizes  
908 cGAS-STING mediated type-I interferon responses by degrading cGAS. *PLoS Pathog.* 16:  
909 e1008999.
- 910 18. Patel, S., S. M. Blaauboer, H. R. Tucker, S. Mansouri, J. S. Ruiz-Moreno, L. Hamann, R.  
911 R. Schumann, B. Opitz, and L. Jin. 2017. The Common R71H-G230A-R293Q Human  
912 TMEM173 Is a Null Allele. *J. Immunol.* 198: 776–787.
- 913 19. Yi, G., V. P. Brendel, C. Shu, P. Li, S. Palanathan, and C. Cheng Kao. 2013. Single  
914 nucleotide polymorphisms of human STING can affect innate immune response to cyclic  
915 dinucleotides. *PLoS One* 8: e77846.
- 916 20. Jin, L., L.-G. Xu, I. V Yang, E. J. Davidson, D. A. Schwartz, M. M. Wurfel, and J. C.  
917 Cambier. 2011. Identification and characterization of a loss-of-function human MPYS variant.  
918 *Genes Immun.* 12: 263–269.
- 919 21. Nissen, S. K., J. G. Pedersen, M. Helleberg, K. Kjær, K. Thavachelvam, N. Obel, M.  
920 Tolstrup, M. R. Jakobsen, and T. H. Mogensen. 2018. Multiple Homozygous Variants in the  
921 STING-Encoding <em>TMEM173</em> Gene in HIV Long-Term  
922 Nonprogressors. *J. Immunol.* 200: 3372 LP – 3382.
- 923 22. Auton, A., G. R. Abecasis, D. M. Altshuler, R. M. Durbin, G. R. Abecasis, D. R. Bentley,  
924 A. Chakravarti, A. G. Clark, P. Donnelly, E. E. Eichler, P. Flicek, S. B. Gabriel, R. A. Gibbs,  
925 E. D. Green, M. E. Hurles, B. M. Knoppers, J. O. Korbel, E. S. Lander, C. Lee, H. Lehrach, E.  
926 R. Mardis, G. T. Marth, G. A. McVean, D. A. Nickerson, J. P. Schmidt, S. T. Sherry, J.  
927 Wang, R. K. Wilson, R. A. Gibbs, E. Boerwinkle, H. Doddapaneni, Y. Han, V. Korchina, C.  
928 Kovar, S. Lee, D. Muzny, J. G. Reid, Y. Zhu, J. Wang, Y. Chang, Q. Feng, X. Fang, X. Guo,  
929 M. Jian, H. Jiang, X. Jin, T. Lan, G. Li, J. Li, Y. Li, S. Liu, X. Liu, Y. Lu, X. Ma, M. Tang, B.

930 Wang, G. Wang, H. Wu, R. Wu, X. Xu, Y. Yin, D. Zhang, W. Zhang, J. Zhao, M. Zhao, X.  
931 Zheng, E. S. Lander, D. M. Altshuler, S. B. Gabriel, N. Gupta, N. Gharani, L. H. Toji, N. P.  
932 Gerry, A. M. Resch, P. Flicek, J. Barker, L. Clarke, L. Gil, S. E. Hunt, G. Kelman, E.  
933 Kulesha, R. Leinonen, W. M. McLaren, R. Radhakrishnan, A. Roa, D. Smirnov, R. E. Smith,  
934 I. Streeter, A. Thormann, I. Toneva, B. Vaughan, X. Zheng-Bradley, D. R. Bentley, R.  
935 Grocock, S. Humphray, T. James, Z. Kingsbury, H. Lehrach, R. Sudbrak, M. W. Albrecht, V.  
936 S. Amstislavskiy, T. A. Borodina, M. Lienhard, F. Mertes, M. Sultan, B. Timmermann, M.-L.  
937 Yaspo, E. R. Mardis, R. K. Wilson, L. Fulton, R. Fulton, S. T. Sherry, V. Ananiev, Z. Belaia,  
938 D. Beloslyudtsev, N. Bouk, C. Chen, D. Church, R. Cohen, C. Cook, J. Garner, T. Hefferon,  
939 M. Kimelman, C. Liu, J. Lopez, P. Meric, C. O'Sullivan, Y. Ostapchuk, L. Phan, S.  
940 Ponomarov, V. Schneider, E. Shekhtman, K. Sirotkin, D. Slotta, H. Zhang, G. A. McVean, R.  
941 M. Durbin, S. Balasubramaniam, J. Burton, P. Danecek, T. M. Keane, A. Kolb-Kokocinski, S.  
942 McCarthy, J. Stalker, M. Quail, J. P. Schmidt, C. J. Davies, J. Gollub, T. Webster, B. Wong,  
943 Y. Zhan, A. Auton, C. L. Campbell, Y. Kong, A. Marcketta, R. A. Gibbs, F. Yu, L. Antunes,  
944 M. Bainbridge, D. Muzny, A. Sabo, Z. Huang, J. Wang, L. J. M. Coin, L. Fang, X. Guo, X.  
945 Jin, G. Li, Q. Li, Y. Li, Z. Li, H. Lin, B. Liu, R. Luo, H. Shao, Y. Xie, C. Ye, C. Yu, F.  
946 Zhang, H. Zheng, H. Zhu, C. Alkan, E. Dal, F. Kahveci, G. T. Marth, E. P. Garrison, D.  
947 Kural, W.-P. Lee, W. Fung Leong, M. Stromberg, A. N. Ward, J. Wu, M. Zhang, M. J. Daly,  
948 M. A. DePristo, R. E. Handsaker, D. M. Altshuler, E. Banks, G. Bhatia, G. del Angel, S. B.  
949 Gabriel, G. Genovese, N. Gupta, H. Li, S. Kashin, E. S. Lander, S. A. McCarroll, J. C.  
950 Nemesh, R. E. Poplin, S. C. Yoon, J. Lihm, V. Makarov, A. G. Clark, S. Gottipati, A. Keinan,  
951 J. L. Rodriguez-Flores, J. O. Korbelt, T. Rausch, M. H. Fritz, A. M. Stütz, P. Flicek, K. Beal,  
952 L. Clarke, A. Datta, J. Herrero, W. M. McLaren, G. R. S. Ritchie, R. E. Smith, D. Zerbino, X.  
953 Zheng-Bradley, P. C. Sabeti, I. Shlyakhter, S. F. Schaffner, J. Vitti, D. N. Cooper, E. V Ball,  
954 P. D. Stenson, D. R. Bentley, B. Barnes, M. Bauer, R. Keira Cheetham, A. Cox, M. Eberle, S.

955 Humphray, S. Kahn, L. Murray, J. Peden, R. Shaw, E. E. Kenny, M. A. Batzer, M. K. Konkel,  
956 J. A. Walker, D. G. MacArthur, M. Lek, R. Sudbrak, V. S. Amstislavskiy, R. Herwig, E. R.  
957 Mardis, L. Ding, D. C. Koboldt, D. Larson, K. Ye, S. Gravel, T. 1000 G. P. Consortium, C.  
958 authors, S. committee, P. group, B. C. of Medicine, BGI-Shenzhen, B. I. of M. I. T. and  
959 Harvard, C. I. for M. Research, E. B. I. European Molecular Biology Laboratory, Illumina, M.  
960 P. I. for M. Genetics, M. G. I. at W. University, U. S. N. I. of Health, U. of Oxford, W. T. S.  
961 Institute, A. group, Affymetrix, A. E. C. of Medicine, B. University, B. College, C. S. H.  
962 Laboratory, C. University, E. M. B. Laboratory, H. University, H. G. M. Database, I. S. of M.  
963 at M. Sinai, L. S. University, M. G. Hospital, M. University, and N. I. H. National Eye  
964 Institute. 2015. A global reference for human genetic variation. *Nature* 526: 68–74.

965 23. McLaren, P. J., C. Coulonges, S. Ripke, L. van den Berg, S. Buchbinder, M. Carrington,  
966 A. Cossarizza, J. Dalmau, S. G. Deeks, O. Delaneau, A. De Luca, J. J. Goedert, D. Haas, J. T.  
967 Herbeck, S. Kathiresan, G. D. Kirk, O. Lambotte, M. Luo, S. Mallal, D. van Manen, J.  
968 Martinez-Picado, L. Meyer, J. M. Miro, J. I. Mullins, N. Obel, S. J. O’Brien, F. Pereyra, F. A.  
969 Plummer, G. Poli, Y. Qi, P. Rucart, M. S. Sandhu, P. R. Shea, H. Schuitemaker, I. Theodorou,  
970 F. Vannberg, J. Veldink, B. D. Walker, A. Weintrob, C. A. Winkler, S. Wolinsky, A. Telenti,  
971 D. B. Goldstein, P. I. W. de Bakker, J.-F. Zagury, and J. Fellay. 2013. Association study of  
972 common genetic variants and HIV-1 acquisition in 6,300 infected cases and 7,200 controls.  
973 *PLoS Pathog.* 9: e1003515.

974 24. Andreeva, L., B. Hiller, D. Kostrewa, C. Lässig, C. C. de Oliveira Mann, D. Jan Drexler,  
975 A. Maiser, M. Gaidt, H. Leonhardt, V. Hornung, and K.-P. Hopfner. 2017. cGAS senses long  
976 and HMGB/TFAM-bound U-turn DNA by forming protein-DNA ladders. *Nature* 549: 394–  
977 398.

978 25. Zhou, W., A. T. Whiteley, C. C. de Oliveira Mann, B. R. Morehouse, R. P. Nowak, E. S.  
979 Fischer, N. S. Gray, J. J. Mekalanos, and P. J. Kranzusch. 2018. Structure of the Human



- 980 cGAS-DNA Complex Reveals Enhanced Control of Immune Surveillance. *Cell* 174: 300-  
981 311.e11.
- 982 26. Emsley, P., and K. Cowtan. 2004. Coot: model-building tools for molecular graphics.  
983 *Acta Crystallogr. D. Biol. Crystallogr.* 60: 2126–2132.
- 984 27. Krissinel, E., and K. Henrick. 2004. Secondary-structure matching (SSM), a new tool for  
985 fast protein structure alignment in three dimensions. *Acta Crystallogr. D. Biol. Crystallogr.*  
986 60: 2256–2268.
- 987 28. Cornell, W. D., P. Cieplak, C. I. Bayly, I. R. Gould, K. M. Merz, D. M. Ferguson, D. C.  
988 Spellmeyer, T. Fox, J. W. Caldwell, and P. A. Kollman. 1995. A Second Generation Force  
989 Field for the Simulation of Proteins, Nucleic Acids, and Organic Molecules. *J. Am. Chem.*  
990 *Soc.* 117: 5179–5197.
- 991 29. Uzé, G., S. Di Marco, E. Mouchel-Vielh, D. Monneron, M. T. Bandu, M. A. Horisberger,  
992 A. Dorques, G. Lutfalla, and K. E. Mogensen. 1994. Domains of interaction between alpha  
993 interferon and its receptor components. *J. Mol. Biol.* 243: 245–257.
- 994 30. Zufferey, R., D. Nagy, R. J. Mandel, L. Naldini, and D. Trono. 1997. Multiply attenuated  
995 lentiviral vector achieves efficient gene delivery in vivo. *Nat. Biotechnol.* 15: 871–875.
- 996 31. Miyoshi, H., M. Takahashi, F. H. Gage, and I. M. Verma. 1997. Stable and efficient gene  
997 transfer into the retina using an HIV-based lentiviral vector. *Proc. Natl. Acad. Sci. U. S. A.* 94:  
998 10319–10323.
- 999 32. Agarwal, S., B. Nikolai, T. Yamaguchi, P. Lech, and N. V. Somia. 2006. Construction and  
1000 Use of Retroviral Vectors Encoding the Toxic Gene Barnase. *Mol. Ther.* 14: 555–563.
- 1001 33. Stewart, S. A., D. M. Dykxhoorn, D. Palliser, H. Mizuno, E. Y. Yu, D. S. An, D. M.  
1002 Sabatini, I. S. Y. Chen, W. C. Hahn, P. A. Sharp, R. A. Weinberg, and C. D. Novina. 2003.

- 1003 Lentivirus-delivered stable gene silencing by RNAi in primary cells. *RNA* 9: 493–501.
- 1004 34. Xu, S., A. Ducroux, A. Ponnurangam, G. Vieyres, S. Franz, M. Müsken, T. Zillinger, A.  
1005 Malassa, E. Ewald, V. Hornung, W. Barchet, S. Häussler, T. Pietschmann, and C. Goffinet.  
1006 2016. cGAS-Mediated Innate Immunity Spreads Intercellularly through HIV-1 Env-Induced  
1007 Membrane Fusion Sites. *Cell Host Microbe* 20: 443–457.
- 1008 35. Connor, R. I., B. K. Chen, S. Choe, and N. R. Landau. 1995. Vpr is required for efficient  
1009 replication of human immunodeficiency virus type-1 in mononuclear phagocytes. *Virology*  
1010 206: 935–944.
- 1011 36. Strelow, L. I., and D. A. Leib. 1995. Role of the virion host shutoff (vhs) of herpes  
1012 simplex virus type 1 in latency and pathogenesis. *J. Virol.* 69: 6779–6786.
- 1013 37. Döhner, K., K. Radtke, S. Schmidt, and B. Sodeik. 2006. Eclipse phase of herpes simplex  
1014 virus type 1 infection: Efficient dynein-mediated capsid transport without the small capsid  
1015 protein VP26. *J. Virol.* 80: 8211–8224.
- 1016 38. Sodeik, B., M. W. Ebersold, and A. Helenius. 1997. Microtubule-mediated transport of  
1017 incoming herpes simplex virus 1 capsids to the nucleus. *J. Cell Biol.* 136: 1007–1021.
- 1018 39. Grosche, L., K. Döhner, A. DÜthorn, A. Hickford-Martinez, A. Steinkasserer, and B.  
1019 Sodeik. 2019. Herpes Simplex Virus Type 1 Propagation, Titration and Single-step Growth  
1020 Curves. *Bio-protocol* 9: e3441.
- 1021 40. Döhner, K., A. Wolfstein, U. Prank, C. Echeverri, D. Dujardin, R. Vallee, and B. Sodeik.  
1022 2002. Function of dynein and dynactin in herpes simplex virus capsid transport. *Mol. Biol.*  
1023 *Cell* 13: 2795–2809.
- 1024 41. Engelmann, I., D. R. Petzold, A. Kosinska, B. G. Hepkema, T. F. Schulz, and A. Heim.  
1025 2008. Rapid quantitative PCR assays for the simultaneous detection of herpes simplex virus,

- 1026 varicella zoster virus, cytomegalovirus, Epstein-Barr virus, and human herpesvirus 6 DNA in  
1027 blood and other clinical specimens. *J. Med. Virol.* 80: 467–477.
- 1028 42. Levitt, N. H., H. H. Ramsburg, S. E. Hasty, P. M. Repik, F. E. J. Cole, and H. W. Lupton.  
1029 1986. Development of an attenuated strain of chikungunya virus for use in vaccine  
1030 production. *Vaccine* 4: 157–162.
- 1031 43. Döhner, K., A. Ramos-Nascimento, D. Bialy, F. Anderson, A. Hickford-Martinez, F.  
1032 Rother, T. Koithan, K. Rudolph, A. Buch, U. Prank, A. Binz, S. Hügel, R. J. Lebbink, R. C.  
1033 Hoeben, E. Hartmann, M. Bader, R. Bauerfeind, and B. Sodeik. 2018. Importin  $\alpha$ 1 is required  
1034 for nuclear import of herpes simplex virus proteins and capsid assembly in fibroblasts and  
1035 neurons. *PLoS Pathog.* 14: e1006823.
- 1036 44. Ashburner, M., C. A. Ball, J. A. Blake, D. Botstein, H. Butler, J. M. Cherry, A. P. Davis,  
1037 K. Dolinski, S. S. Dwight, J. T. Eppig, M. A. Harris, D. P. Hill, L. Issel-Tarver, A. Kasarskis,  
1038 S. Lewis, J. C. Matese, J. E. Richardson, M. Ringwald, G. M. Rubin, and G. Sherlock. 2000.  
1039 Gene ontology: tool for the unification of biology. The Gene Ontology Consortium. *Nat.*  
1040 *Genet.* 25: 25–29.
- 1041 45. 2019. The Gene Ontology Resource: 20 years and still GOing strong. *Nucleic Acids Res.*  
1042 47: D330–D338.
- 1043 46. Pablos, J. L., B. Santiago, P. E. Carreira, M. Galindo, and J. J. Gomez-Reino. 1999.  
1044 Cyclooxygenase-1 and -2 are expressed by human T cells. *Clin. Exp. Immunol.* 115: 86–90.
- 1045 47. Huang, C. C., K. E. Duffy, L. R. San Mateo, B. Y. Amegadzie, R. T. Sarisky, and M. L.  
1046 Mbow. 2006. A pathway analysis of poly(I:C)-induced global gene expression change in  
1047 human peripheral blood mononuclear cells. *Physiol. Genomics* 26: 125–133.
- 1048 48. Civril, F., T. Deimling, C. C. de Oliveira Mann, A. Ablasser, M. Moldt, G. Witte, V.

- 1049 Hornung, and K.-P. Hopfner. 2013. Structural mechanism of cytosolic DNA sensing by  
1050 cGAS. *Nature* 498: 332–337.
- 1051 49. Luecke, S., A. Holleufer, M. H. Christensen, K. L. Jønsson, G. A. Boni, L. K. Sørensen,  
1052 M. Johannsen, M. R. Jakobsen, R. Hartmann, and S. R. Paludan. 2017. cGAS is activated by  
1053 DNA in a length-dependent manner. *EMBO Rep.* 18: 1707–1715.
- 1054 50. Dean, M., M. Carrington, C. Winkler, G. A. Huttley, M. W. Smith, R. Allikmets, J. J.  
1055 Goedert, S. P. Buchbinder, E. Vittinghoff, E. Gomperts, S. Donfield, D. Vlahov, R. Kaslow,  
1056 A. Saah, C. Rinaldo, R. Detels, and S. J. O’Brien. 1996. Genetic restriction of HIV-1 infection  
1057 and progression to AIDS by a deletion allele of the CKR5 structural gene. Hemophilia  
1058 Growth and Development Study, Multicenter AIDS Cohort Study, Multicenter Hemophilia  
1059 Cohort Study, San Francisco City Cohort, ALIVE. *Science* 273: 1856–1862.
- 1060 51. Thada, S., S. Burkert, R. Sivangala, A. Hussain, S. Sur, N. Dittrich, M. L. Conrad, H.  
1061 Slevogt, S. Latha Gaddam, and R. R. Schumann. 2020. A SNP upstream of the cyclic GMP-  
1062 AMP synthase (cGAS) gene protects from relapse and extra-pulmonary TB and relates to  
1063 BCG vaccination status in an Indian cohort. *Genes Immun.* 21: 13–26.
- 1064 52. West, A. P., W. Khoury-Hanold, M. Staron, M. C. Tal, C. M. Pineda, S. M. Lang, M.  
1065 Bestwick, B. A. Duguay, N. Raimundo, D. A. MacDuff, S. M. Kaech, J. R. Smiley, R. E.  
1066 Means, A. Iwasaki, and G. S. Shadel. 2015. Mitochondrial DNA stress primes the antiviral  
1067 innate immune response. *Nature* 520: 553–557.
- 1068 53. Maekawa, H., T. Inoue, H. Ouchi, T.-M. Jao, R. Inoue, H. Nishi, R. Fujii, F. Ishidate, T.  
1069 Tanaka, Y. Tanaka, N. Hirokawa, M. Nangaku, and R. Inagi. 2019. Mitochondrial Damage  
1070 Causes Inflammation via cGAS-STING Signaling in Acute Kidney Injury. *Cell Rep.* 29:  
1071 1261-1273.e6.
- 1072 54. Sun, B., K. B. Sundström, J. J. Chew, P. Bist, E. S. Gan, H. C. Tan, K. C. Goh, T. Chawla,

- 1073 C. K. Tang, and E. E. Ooi. 2017. Dengue virus activates cGAS through the release of  
1074 mitochondrial DNA. *Sci. Rep.* 7: 3594.
- 1075 55. Aguirre, S., P. Luthra, M. T. Sanchez-Aparicio, A. M. Maestre, J. Patel, F. Lamothe, A. C.  
1076 Fredericks, S. Tripathi, T. Zhu, J. Pintado-Silva, L. G. Webb, D. Bernal-Rubio, A. Solovyov,  
1077 B. Greenbaum, V. Simon, C. F. Basler, L. C. F. Mulder, A. García-Sastre, and A. Fernandez-  
1078 Sesma. 2017. Dengue virus NS2B protein targets cGAS for degradation and prevents  
1079 mitochondrial DNA sensing during infection. *Nat. Microbiol.* 2: 17037.
- 1080 56. Melki, R., G. Batelier, S. Soulié, and R. C. J. Williams. 1997. Cytoplasmic chaperonin  
1081 containing TCP-1: structural and functional characterization. *Biochemistry* 36: 5817–5826.
- 1082 57. Burdick, R. C., C. Li, M. Munshi, J. M. O. Rawson, K. Nagashima, W.-S. Hu, and V. K.  
1083 Pathak. 2020. HIV-1 uncoats in the nucleus near sites of integration. *Proc. Natl. Acad. Sci.*  
1084 117: 5486 LP – 5493.
- 1085 58. Francis, A. C., and G. B. Melikyan. 2018. Single HIV-1 Imaging Reveals Progression of  
1086 Infection through CA-Dependent Steps of Docking at the Nuclear Pore, Uncoating, and  
1087 Nuclear Transport. *Cell Host Microbe* 23: 536-548.e6.
- 1088 59. Sali, T. M., K. M. Pryke, J. Abraham, A. Liu, I. Archer, R. Broeckel, J. A. Staverosky, J.  
1089 L. Smith, A. Al-Shammari, L. Amsler, K. Sheridan, A. Nilsen, D. N. Streblow, and V. R.  
1090 DeFilippis. 2015. Characterization of a Novel Human-Specific STING Agonist that Elicits  
1091 Antiviral Activity Against Emerging Alphaviruses. *PLoS Pathog.* 11: e1005324.
- 1092 60. Gall, B., K. Pryke, J. Abraham, N. Mizuno, S. Botto, T. M. Sali, R. Broeckel, N. Haese,  
1093 A. Nilsen, A. Placzek, T. Morrison, M. Heise, D. Streblow, and V. DeFilippis. 2018.  
1094 Emerging Alphaviruses Are Sensitive to Cellular States Induced by a Novel Small-Molecule  
1095 Agonist of the STING Pathway. *J. Virol.* 92.

- 1096 61. Sun, C., S. Luecke, C. Bodda, K. L. Jønsson, Y. Cai, B.-C. Zhang, S. B. Jensen, I.  
1097 Nordentoft, J. M. Jensen, M. R. Jakobsen, and S. R. Paludan. 2019. Cellular Requirements for  
1098 Sensing and Elimination of Incoming HSV-1 DNA and Capsids. *J. Interf. cytokine Res. Off. J.*  
1099 *Int. Soc. Interf. Cytokine Res.* 39: 191–204.
- 1100 62. Horan, K. A., K. Hansen, M. R. Jakobsen, C. K. Holm, S. Søby, L. Unterholzner, M.  
1101 Thompson, J. A. West, M. B. Iversen, S. B. Rasmussen, S. Ellermann-Eriksen, E. Kurt-Jones,  
1102 S. Landolfo, B. Damania, J. Melchjorsen, A. G. Bowie, K. A. Fitzgerald, and S. R. Paludan.  
1103 2013. Proteasomal degradation of herpes simplex virus capsids in macrophages releases DNA  
1104 to the cytosol for recognition by DNA sensors. *J. Immunol.* 190: 2311–2319.
- 1105
- 1106
- 1107
- 1108
- 1109

**Table 1, Kazmierski et al**

| SNP                | Alleles | Amino Acids | Total     |             | African   |             | Europe    |             |
|--------------------|---------|-------------|-----------|-------------|-----------|-------------|-----------|-------------|
|                    |         |             | Reference | Alternative | Reference | Alternative | Reference | Alternative |
| <i>rs9352000</i>   | G>T     | T35N        | 15,65     | 84,35       | 14,37     | 85,63       | 16,28     | 83,72       |
| <i>rs610913</i>    | G>T     | P261H       | 49,72     | 50,28       | 63,09     | 36,91       | 35,59     | 64,41       |
| <i>rs35629782</i>  | G>T     | A48E        | 94,98     | 5,02        | 98,44     | 5,51        | 94,49     | 5,51        |
| <i>rs141133909</i> | C>T     | G101R       | 97,95     | 2,05        | 99,38     | 0,62        | 97,79     | 2,21        |
| <i>rs145259959</i> | A>G     | L239P       | 99,80     | 0,20        | 99,98     | 0,02        | 99,78     | 0,22        |
| <i>rs138984002</i> | T>A     | Y483F       | 99,96     | 0,04        | 99,74     | 0,26        | 100,00    | 0,00        |
| <i>rs114473784</i> | C>T     | E422K       | 99,96     | 0,04        | 98,73     | 1,27        | 100,00    | 0,00        |
| <i>rs141390590</i> | G>T     | F433L       | 99,98     | 0,03        | 100,00    | 0,00        | 99,97     | 0,03        |
| <i>rs146116825</i> | G>C     | S393C       | 99,98     | 0,02        | 99,90     | 0,10        | 100,00    | 0,00        |

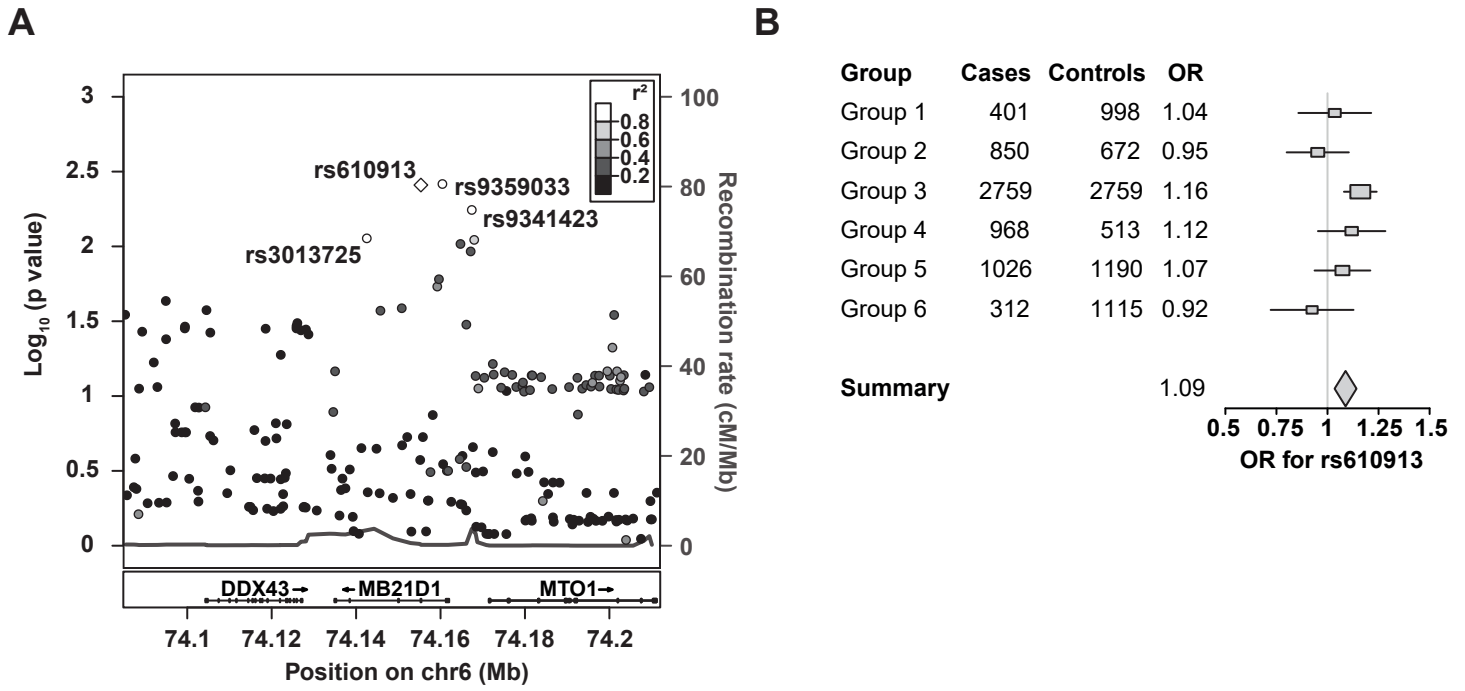



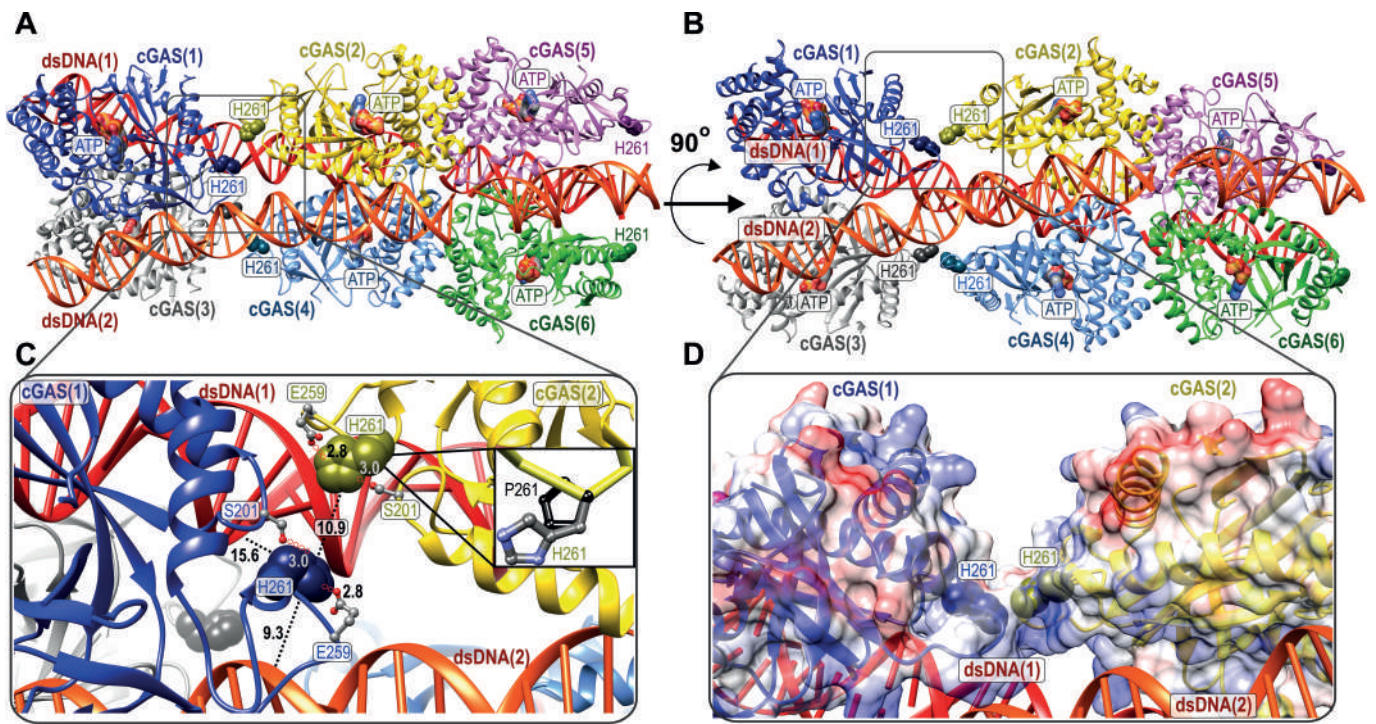

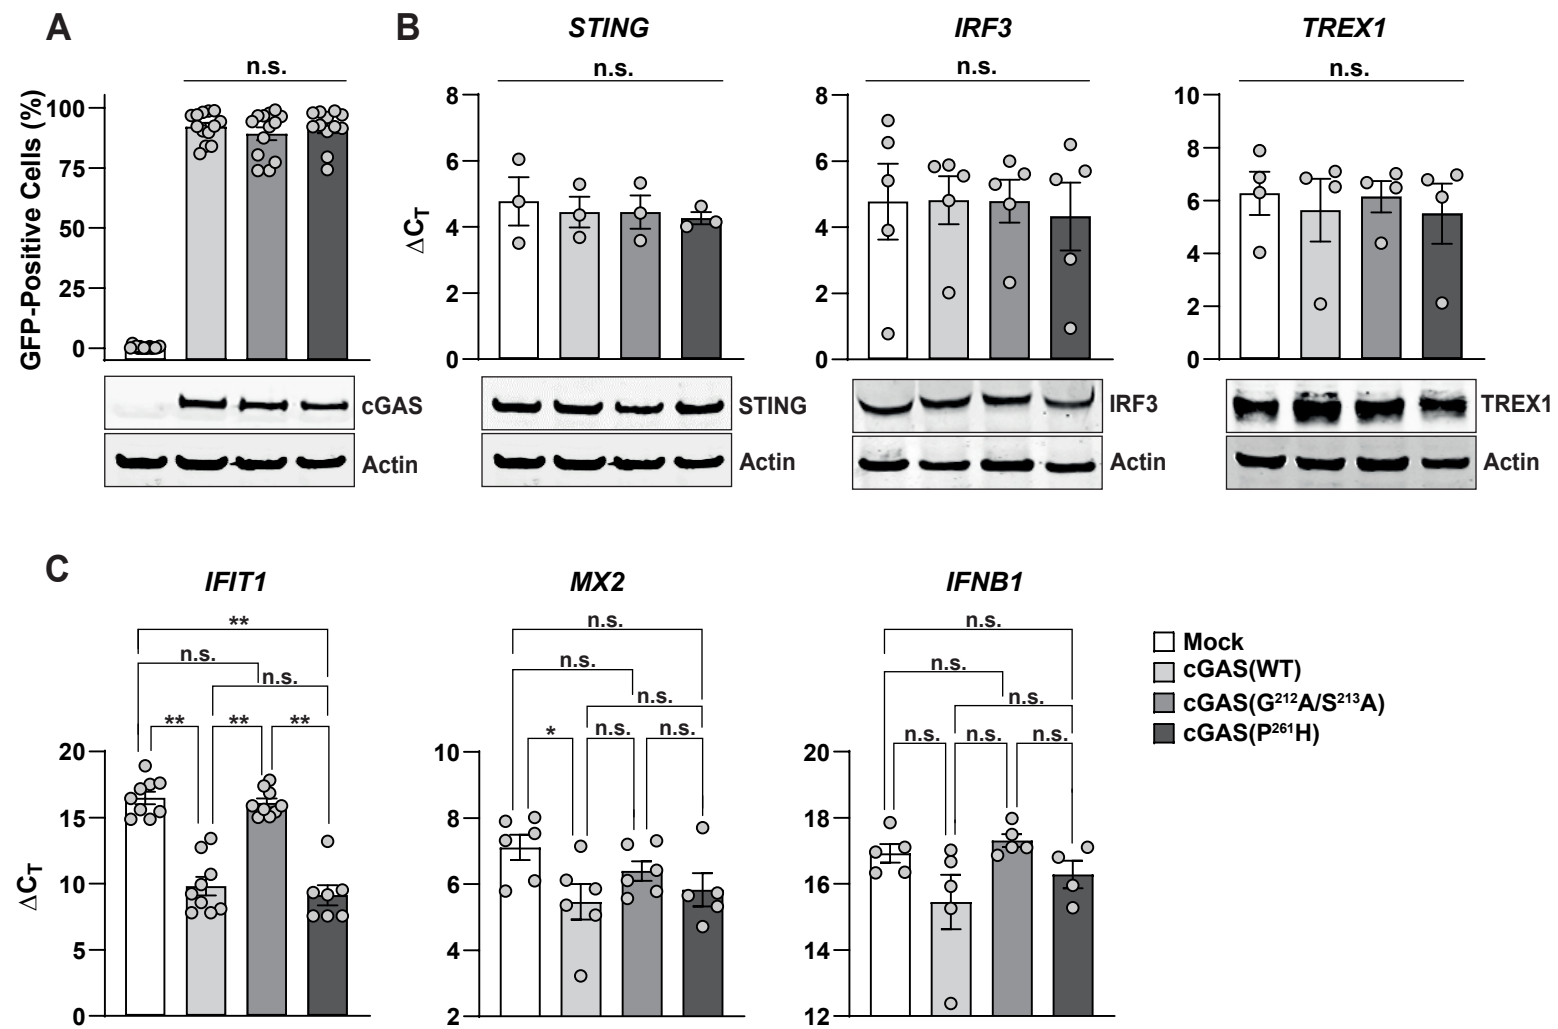

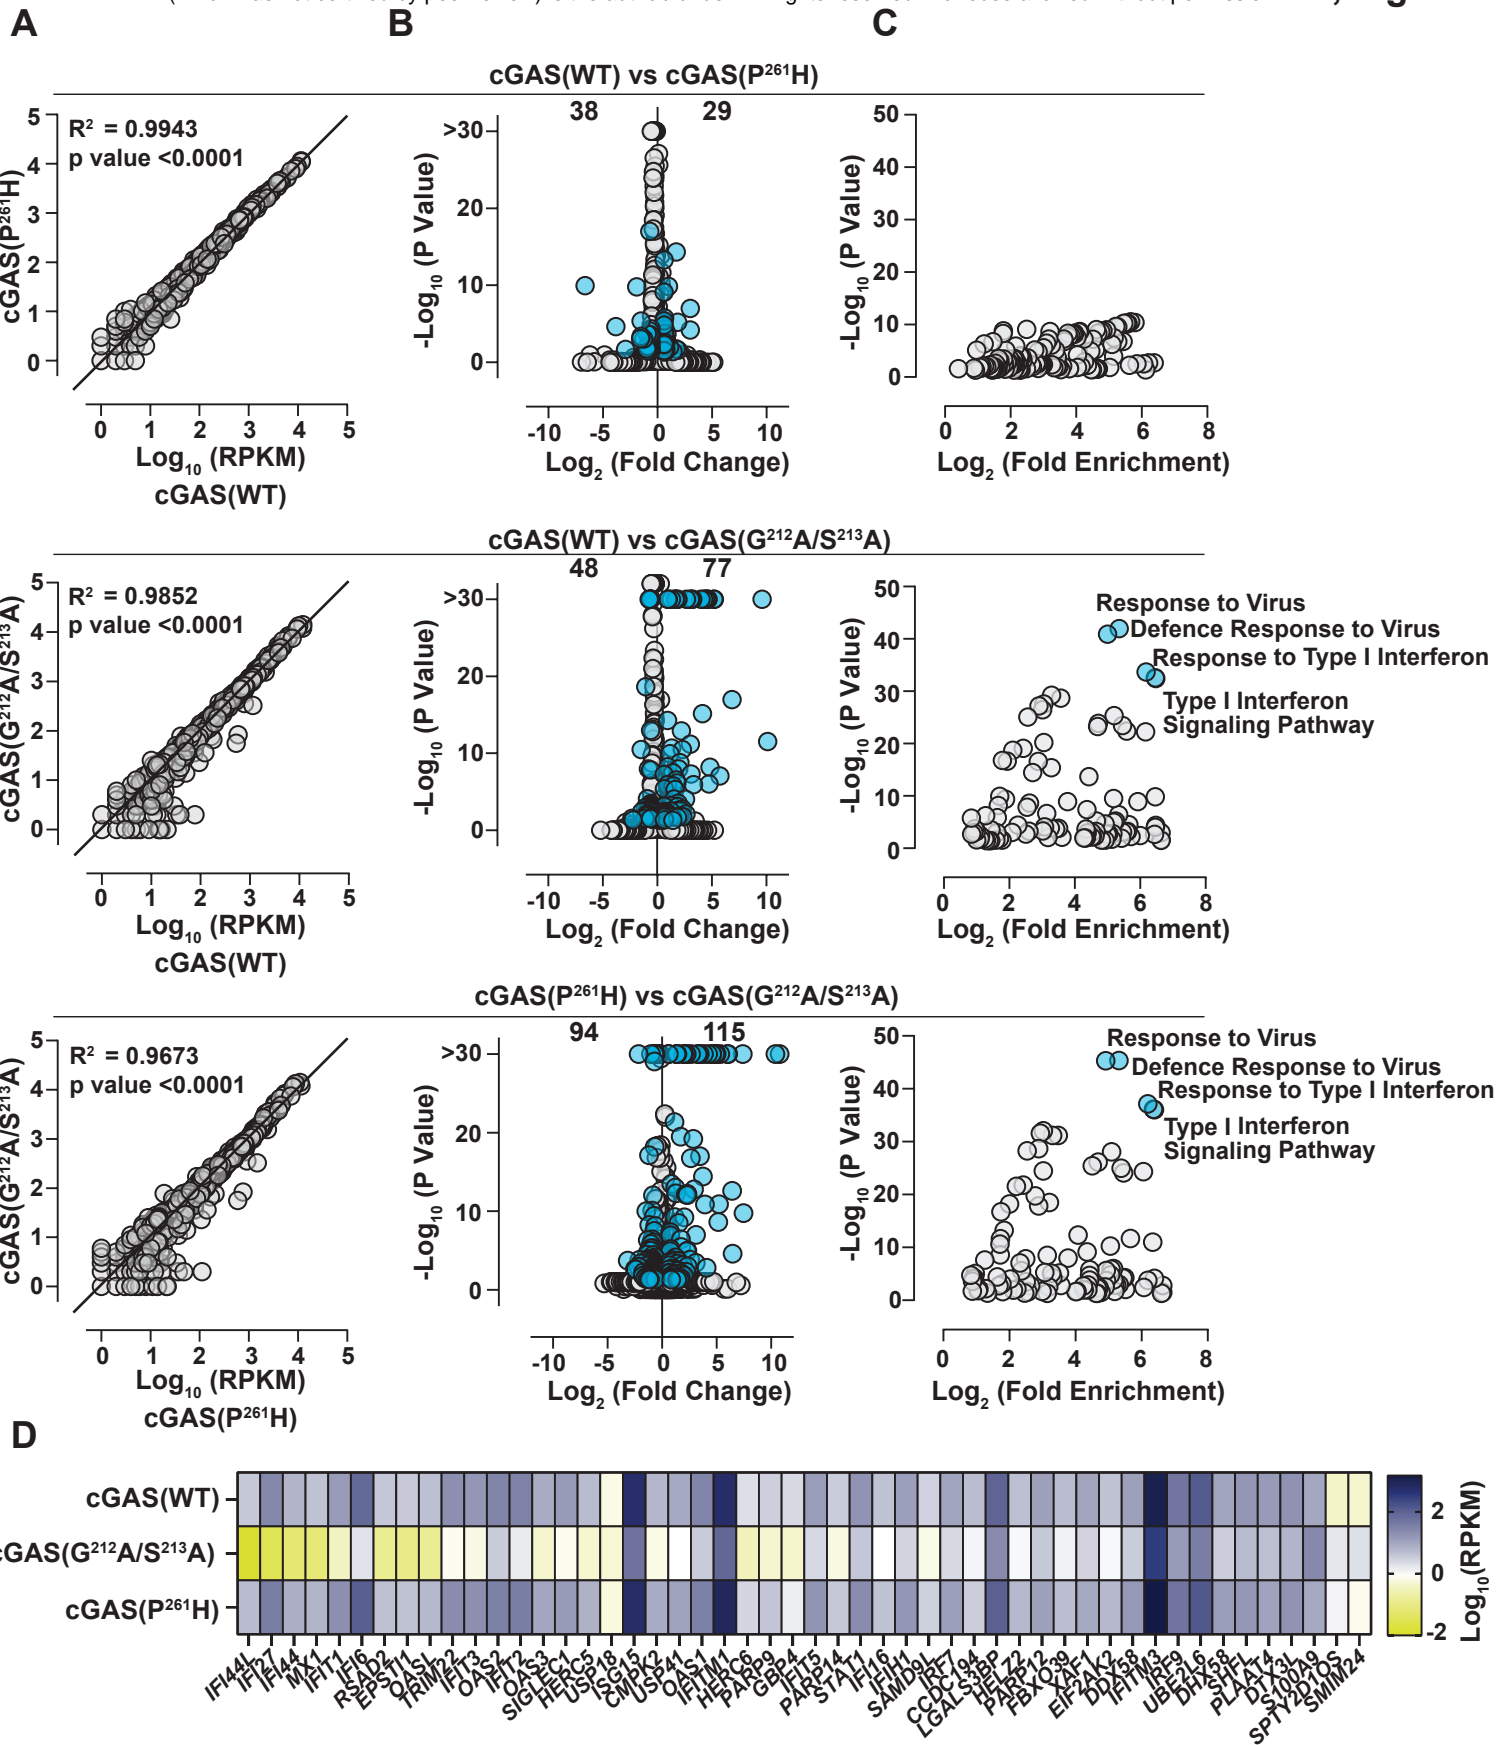

**A**

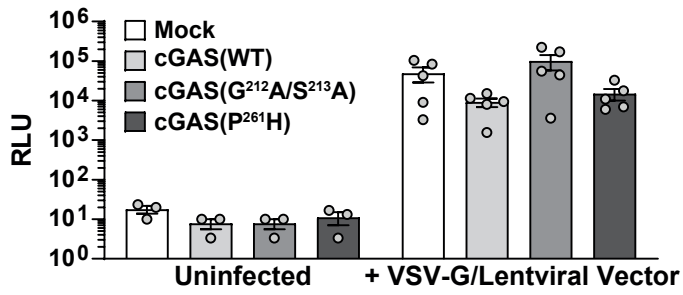

**B**

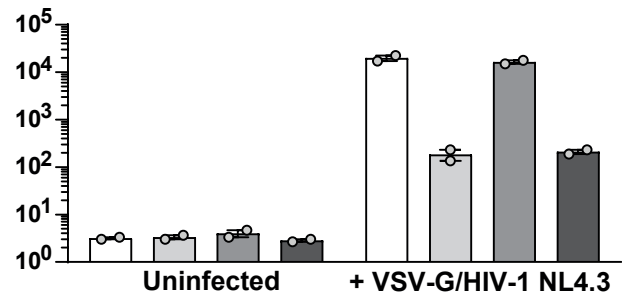

**C**

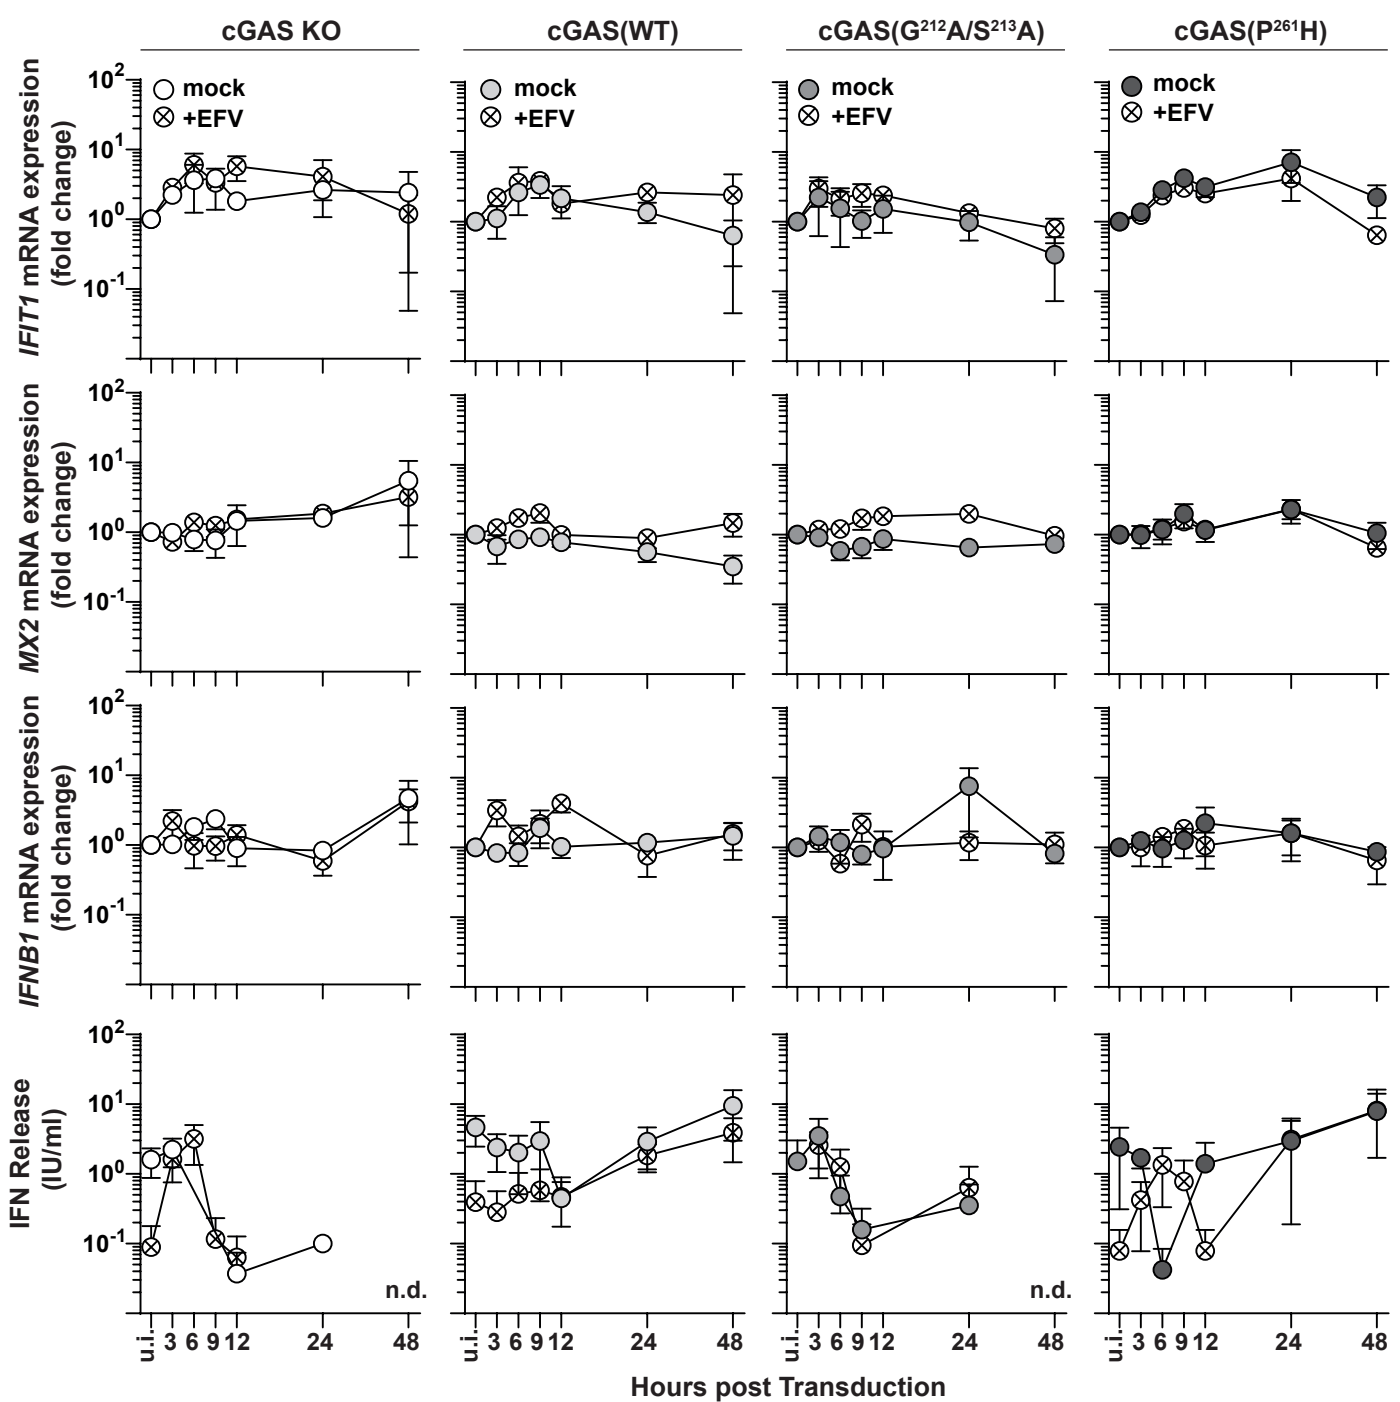

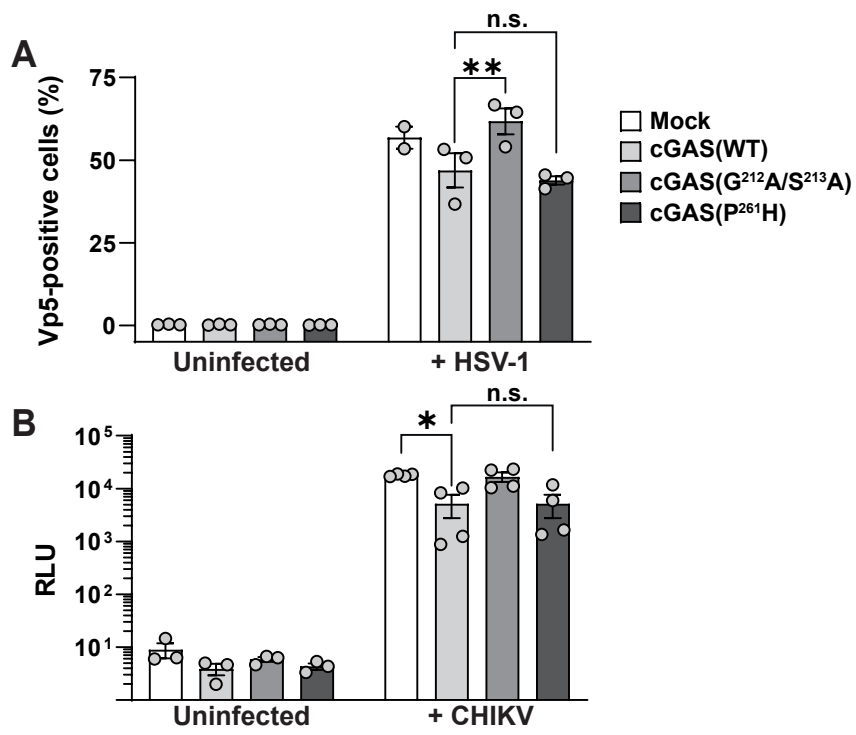

**A**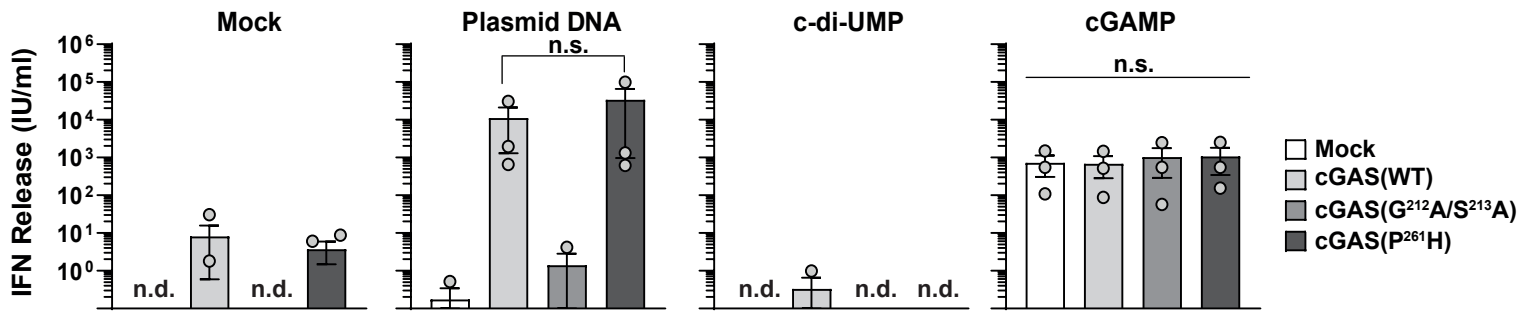**B**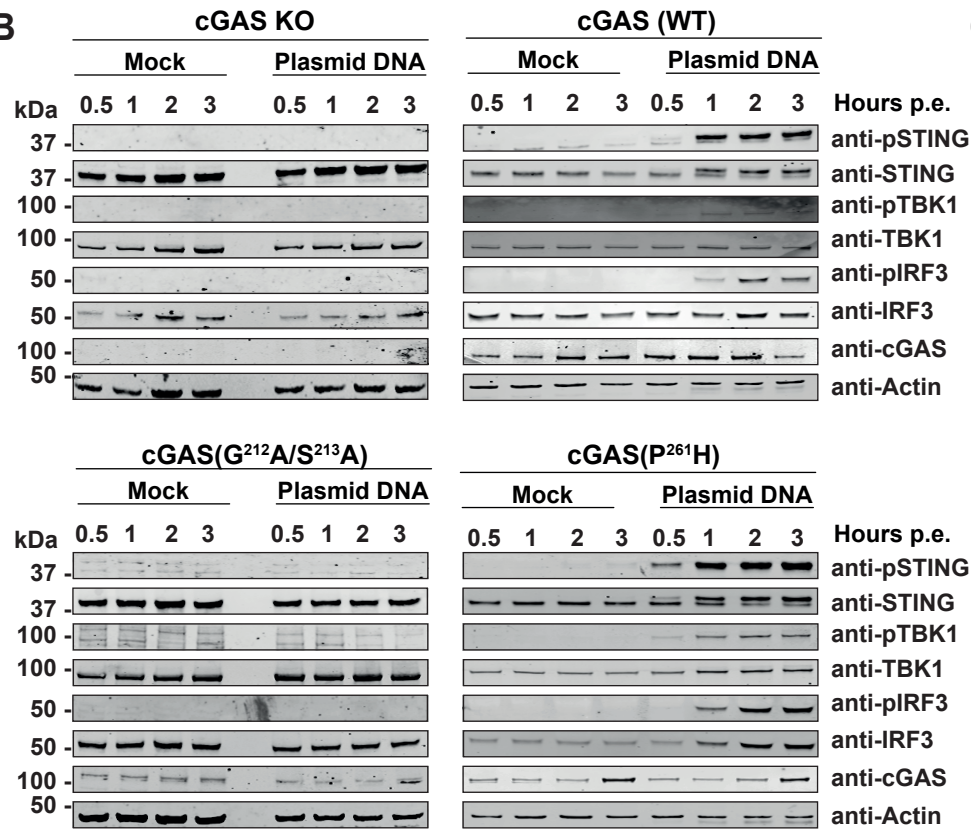**C**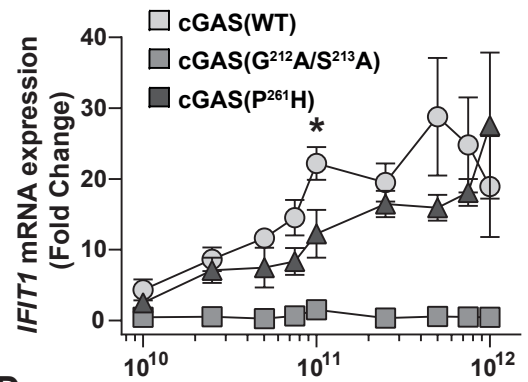**D**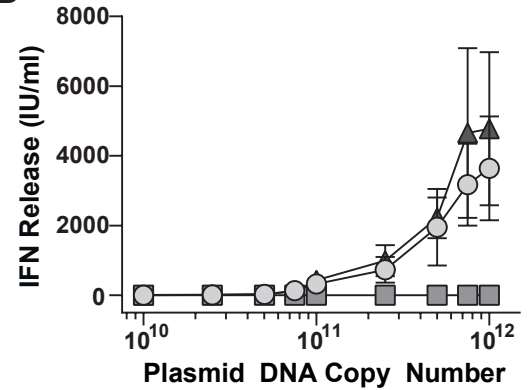**E**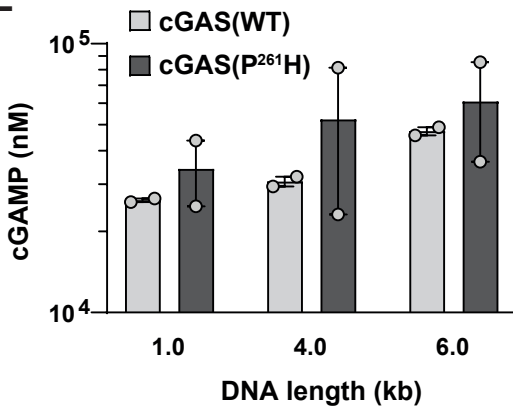

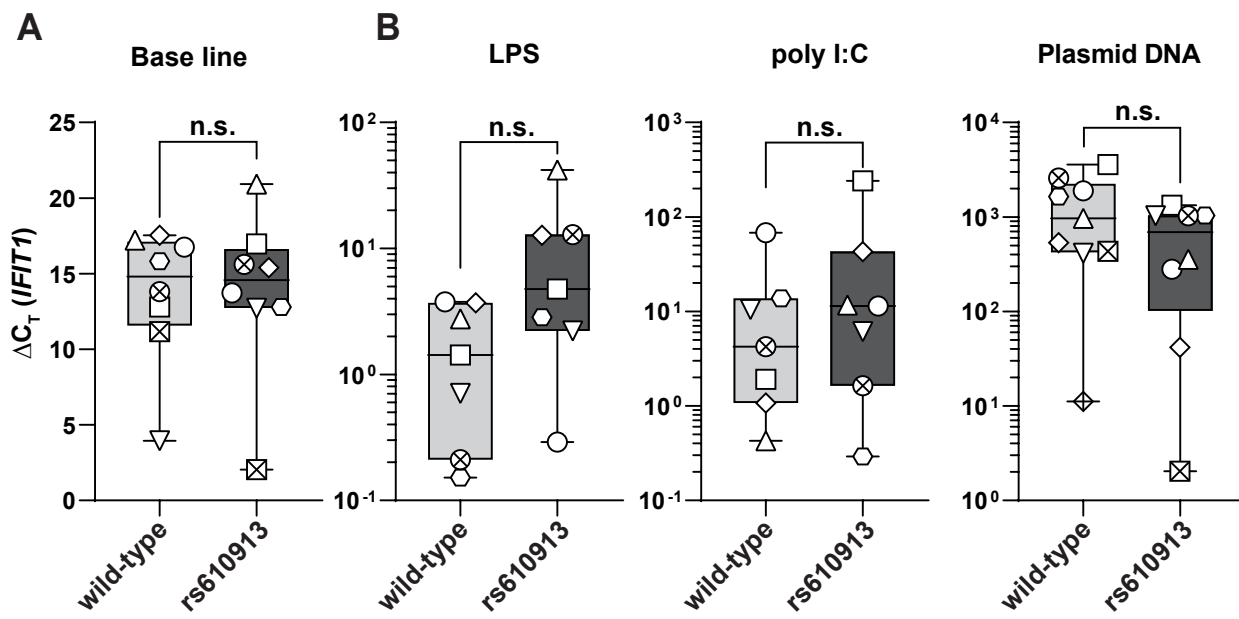

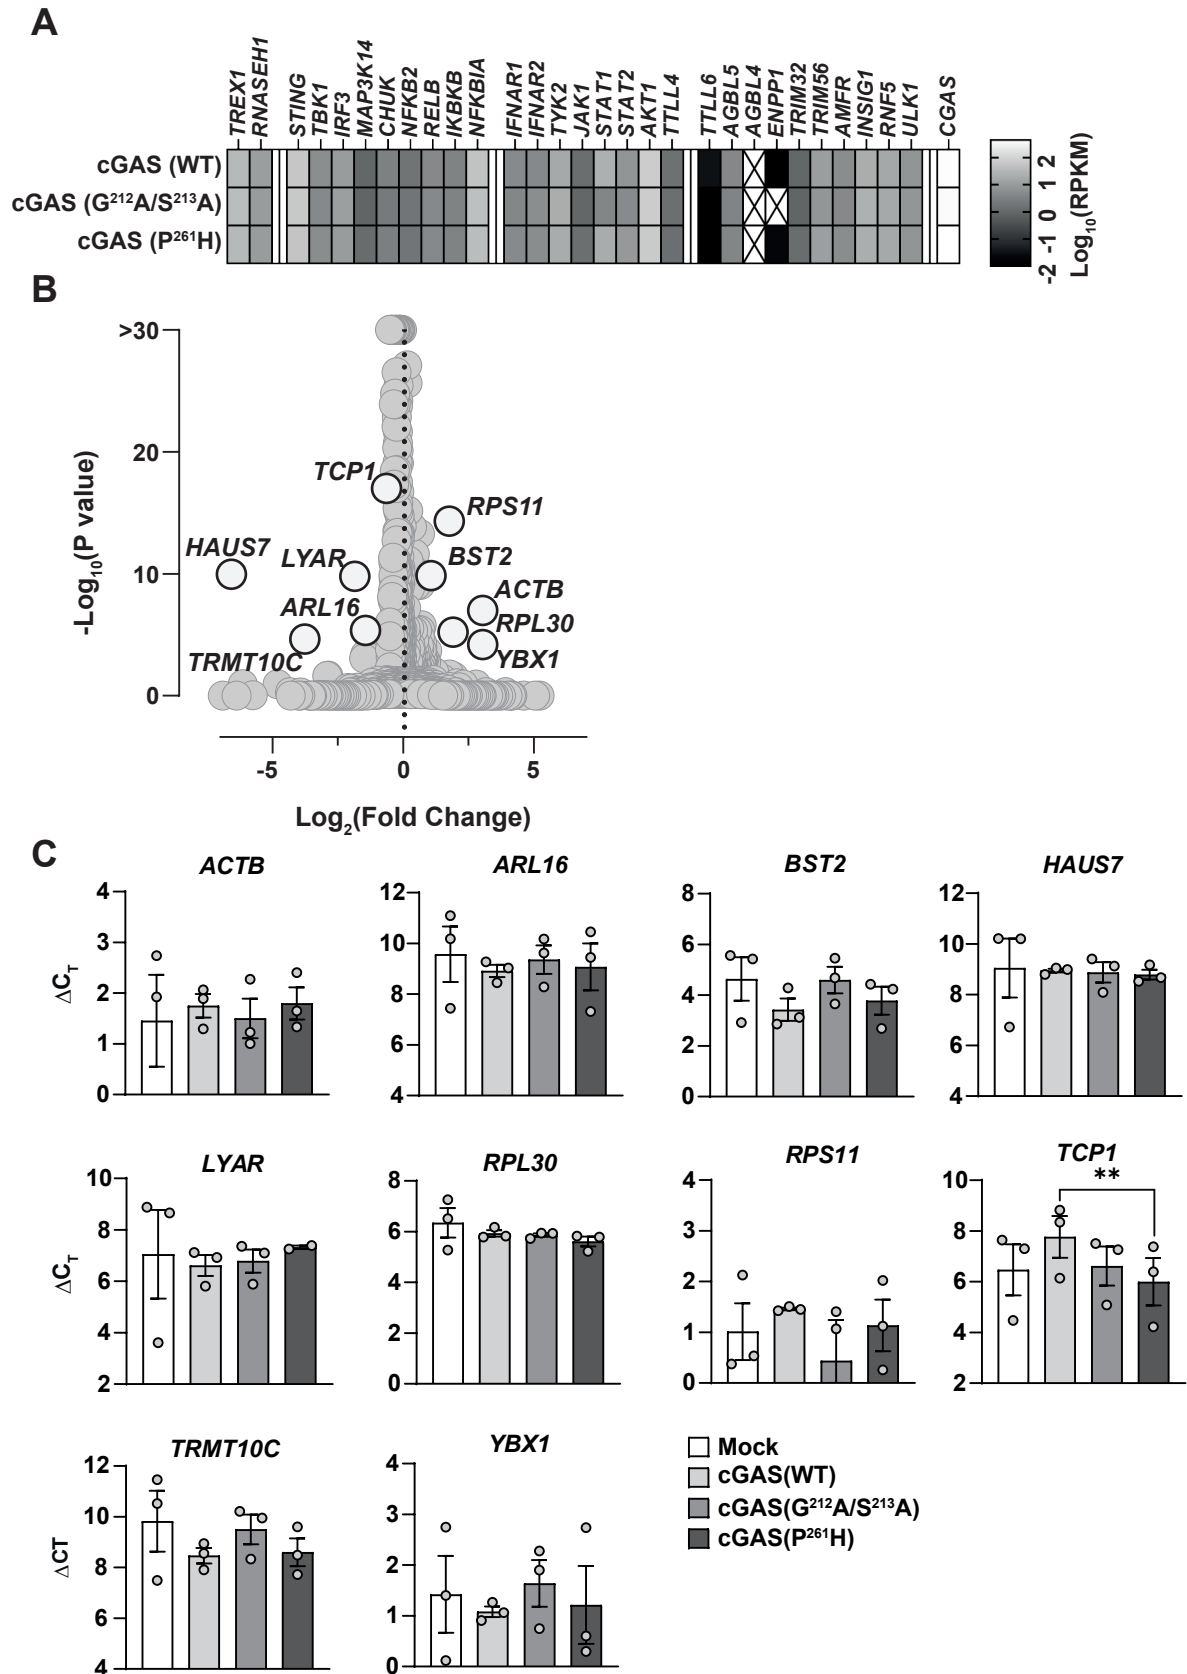

**SUPPLEMENTAL FIGURE 1. Transcriptomic Analysis of THP-1 cells stably expressing cGAS variants**

- (A) Heatmap showing the raw RPKM values of genes involved in the cGAS/STING signaling axis.
- (B) Plot of differential expressed genes in cGAS(WT) vs cGAS(P<sup>261</sup>H) samples. Genes that were verified by RT-Q-PCR are highlighted in white.
- (C) C<sub>T</sub> values of selected genes normalized to RNASEP expression tested by RT-Q-PCR.



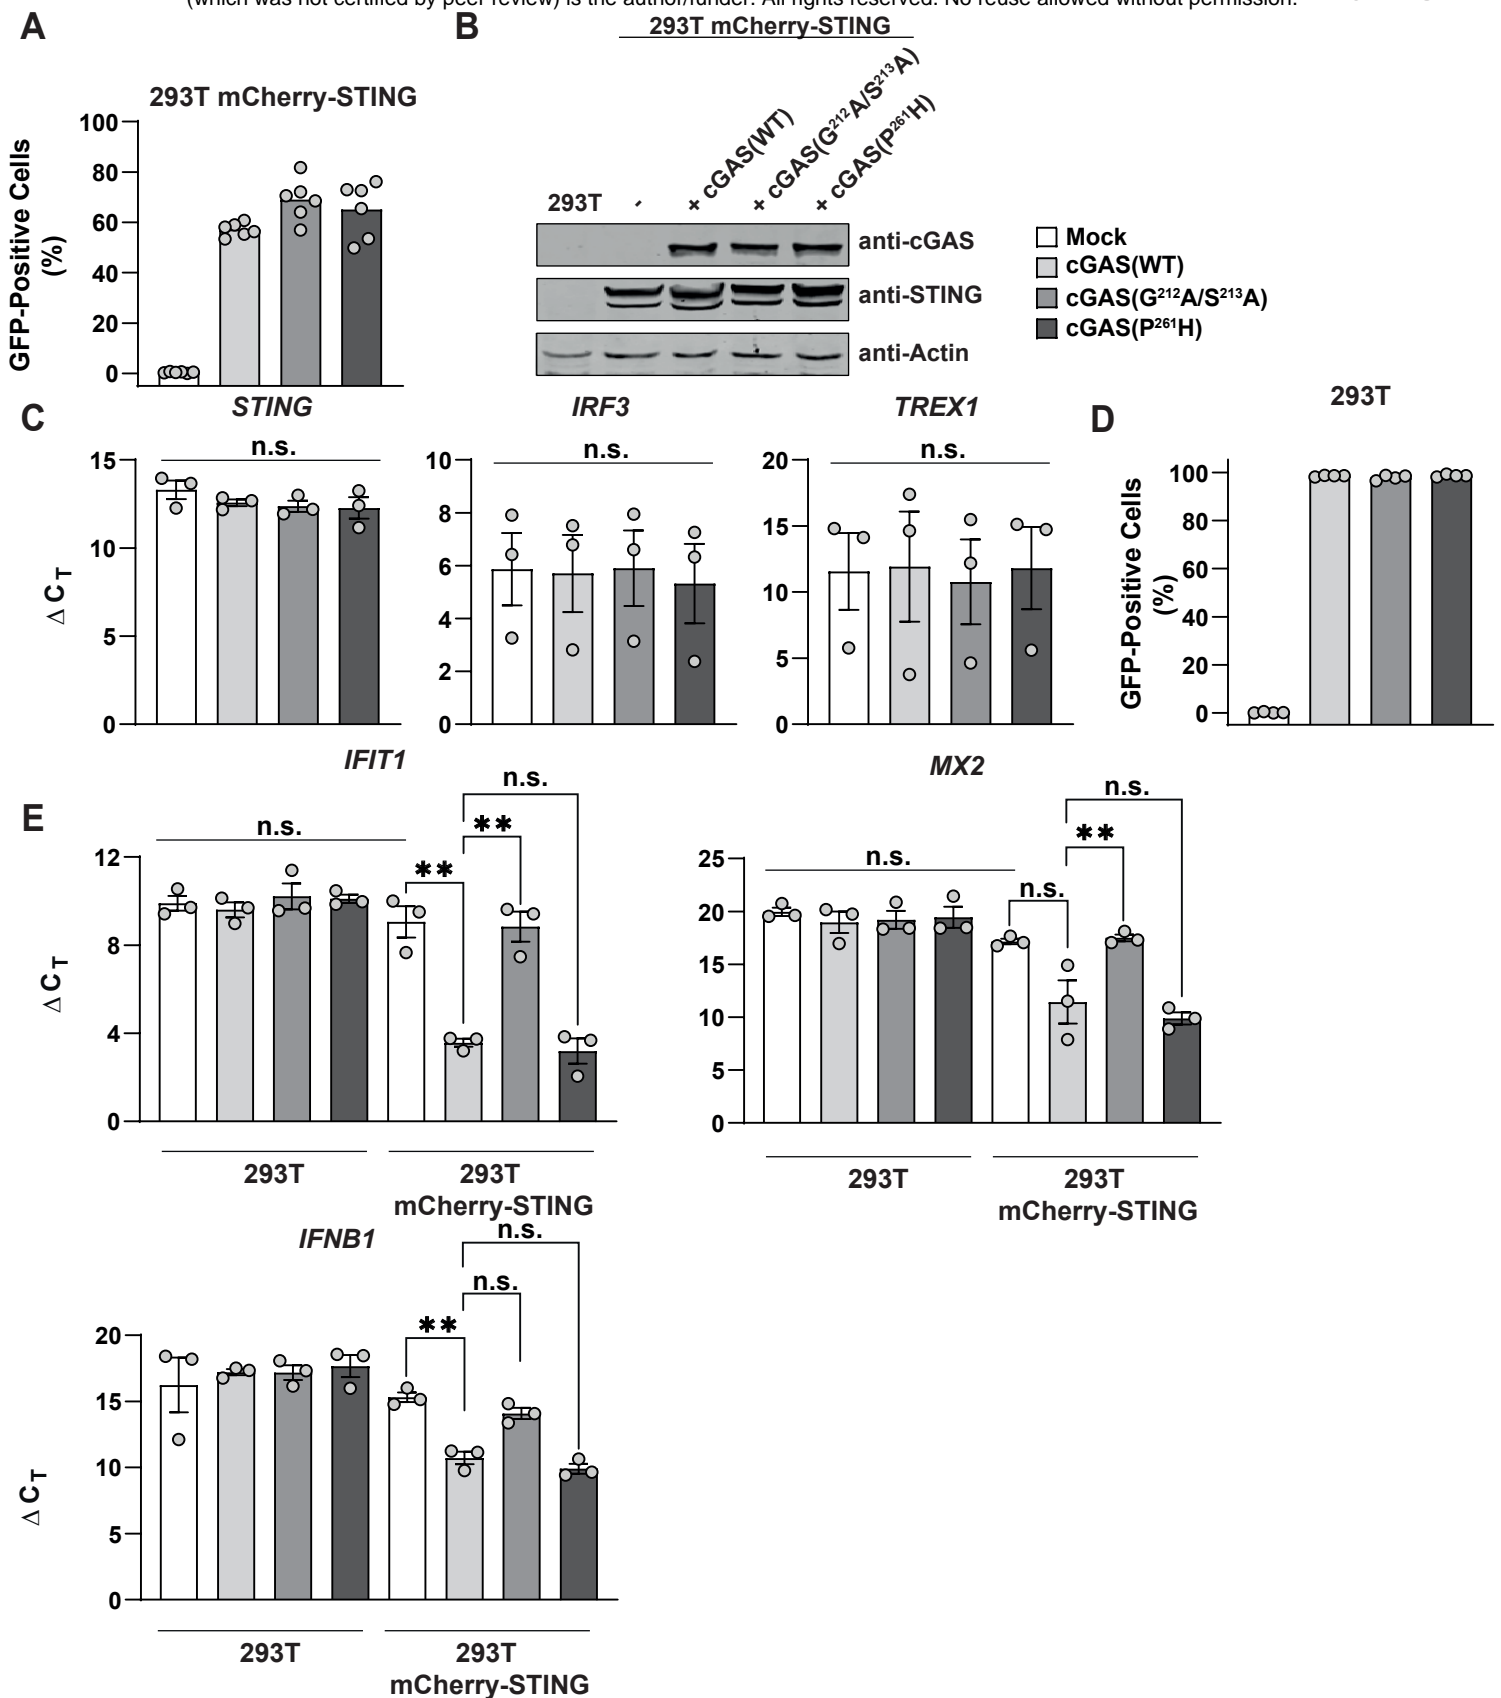

**SUPPLEMENTAL FIGURE 2. HEK293T cells reconstituted with cGAS and STING display a cGAS-specific ISG expression profile**

- (A) HEK293T cells stably expressing mCherry-STING were reconstituted with individual cGAS-GFP variants. GFP expression was monitored using Flow Cytometry.
- (B) HEK293T cells that lack endogenous STING expression were reconstituted with cGAS-GFP variants and GFP expression was quantified using Flow Cytometry.
- (C) Immunoblot analysis of indicated HEK293T cell lysates. One representative blot of two is shown.
- (D) Expression of STING, IRF3 and TREX1 mRNA in indicated HEK293T mCherry-STING cells was quantified by RT-Q-PCR and normalized to RNASEP mRNA expression.
- (E) Base line mRNA expression of IFIT1, MX2 and IFNB1 in indicated cells analyzed by RT-Q-PCR and normalized to RNaseP mRNA expression.
- Error bars indicated S.E.M. from  $\geq 3$  individual experiments.
